# Supplementary material
Source: PubMed Central journal article supplement (PMC4168782)
Supplement: jo501501z_si_001.pdf [file jo501501z_si_001.pdf]

# Shornephine A: Structure, chemical stability and P-glycoprotein inhibitory properties of a rare diketomorpholine from an Australian marine-derived *Aspergillus* sp.

Zeinab G. Khalil, Xiao-cong Huang, Ritesh Raju, Andrew M. Piggott and Robert J. Capon\*

*Institute for Molecular Bioscience, The University of Queensland, St. Lucia, QLD, 4072, Australia*

## Table of Contents

|          |                                                                                                                  |           |
|----------|------------------------------------------------------------------------------------------------------------------|-----------|
| <b>1</b> | <b>DNA Taxonomic Analysis of CMB-M081F .....</b>                                                                 | <b>4</b>  |
| 1.1      | ITS Gene Sequence of CMB-M081F .....                                                                             | 4         |
| <b>2</b> | <b>Cytotoxicity (MTT) Assays.....</b>                                                                            | <b>5</b>  |
| <b>3</b> | <b>Chromatograms.....</b>                                                                                        | <b>5</b>  |
| 3.1      | HPLC-DAD chromatogram of CMB-M081F M1 agar plate extract .....                                                   | 5         |
| 3.2      | HPLC-DAD-ESIMS chromatograms of Mosher esters .....                                                              | 6         |
| 3.3      | Methanolysis of shornephine A ( <b>1</b> ) .....                                                                 | 7         |
| 3.4      | Methanolysis of <i>cyclo</i> -(L-phenylalanine-L-mandelic acid) ( <b>17</b> ) .....                              | 8         |
| 3.5      | Methanolysis of <i>cyclo</i> -(N-methyl-L-tyrosine-L-phenyllactic acid) ( <b>26</b> ) .....                      | 9         |
| <b>4</b> | <b>Biological Data.....</b>                                                                                      | <b>30</b> |
| 4.1      | Antibiotic Screening Data for <b>1–4</b> and <b>1a</b> .....                                                     | 30        |
| 4.2      | Cytotoxicity and Calcein AM Screening Data for <b>1–4</b> and synthetic DKMs <b>17–24</b> and <b>19–22</b> ..... | 32        |
| <b>5</b> | <b>References .....</b>                                                                                          | <b>34</b> |

## List of Figures

|                                                                                                                                                                    |    |
|--------------------------------------------------------------------------------------------------------------------------------------------------------------------|----|
| Figure S1. Expansion of HPLC-DAD chromatogram of the crude extract CMB-M81F .....                                                                                  | 5  |
| Figure S2. Analytical HPLC for the Mosher ester of shornephine A ( <b>1</b> ).....                                                                                 | 6  |
| Figure S3. HPLC-DAD chromatogram of shornephine A ( <b>1</b> ) in MeOH .....                                                                                       | 7  |
| Figure S4. HPLC-DAD chromatogram of <i>cyclo</i> -(L-phenylalanine-L-mandelic acid) ( <b>17</b> ) in MeOH .....                                                    | 8  |
| Figure S5. HPLC-DAD chromatogram of <i>cyclo</i> -( <i>N</i> -methyl-L-tyrosine-L-phenyllactic acid) ( <b>26</b> ) in MeOH .....                                   | 9  |
| Figure S6. <sup>1</sup> H NMR (600 MHz, CDCl <sub>3</sub> ) and UV-vis spectra of shornephine A ( <b>1</b> ) .....                                                 | 15 |
| Figure S7. HMBC NMR (600 MHz, CDCl <sub>3</sub> ) spectrum of shornephine A ( <b>1</b> ).....                                                                      | 15 |
| Figure S8. <sup>1</sup> H NMR (600 MHz, DMSO- <i>d</i> <sub>6</sub> ) and UV-vis spectra of <i>seco</i> -shornephine A methyl ester ( <b>1a</b> ).....             | 16 |
| Figure S9. HMBC NMR (600 MHz, DMSO- <i>d</i> <sub>6</sub> ) spectrum of <i>seco</i> -shornephine A methyl ester ( <b>1a</b> ) .....                                | 16 |
| Figure S10. <sup>1</sup> H NMR (600 MHz, CDCl <sub>3</sub> ) spectrum of 15b-β-hydroxy-5- <i>N</i> -acetylardeemin ( <b>2</b> ).....                               | 17 |
| Figure S11. <sup>13</sup> C NMR (150 MHz, CDCl <sub>3</sub> ) spectrum of 15b-β-hydroxy-5- <i>N</i> -acetylardeemin ( <b>2</b> ).....                              | 17 |
| Figure S12. <sup>1</sup> H NMR (600 MHz, CDCl <sub>3</sub> ) spectrum of 5- <i>N</i> -acetylardeemin ( <b>3</b> ) .....                                            | 18 |
| Figure S13. <sup>13</sup> C NMR (150 MHz, CDCl <sub>3</sub> ) spectrum of 5- <i>N</i> -acetylardeemin ( <b>3</b> ) .....                                           | 18 |
| Figure S14. <sup>1</sup> H NMR (600 MHz, CDCl <sub>3</sub> ) and UV-vis spectra of 15b-β-methoxy-5- <i>N</i> -acetylardeemin ( <b>4</b> ) .....                    | 19 |
| Figure S15. <sup>13</sup> C NMR (150 MHz, CDCl <sub>3</sub> ) spectrum of 15b-β-methoxy-5- <i>N</i> -acetylardeemin ( <b>4</b> ) .....                             | 19 |
| Figure S16. <sup>1</sup> H NMR (600 MHz, CDCl <sub>3</sub> ) spectrum of <i>cyclo</i> -(L-phenylalanine-L-mandelic acid) ( <b>17</b> ) .....                       | 20 |
| Figure S17. <sup>13</sup> C NMR (150 MHz, CDCl <sub>3</sub> ) spectrum of <i>cyclo</i> -(L-phenylalanine-L-mandelic acid) ( <b>17</b> ).....                       | 20 |
| Figure S18. <sup>1</sup> H NMR (600 MHz, CDCl <sub>3</sub> ) spectrum of <i>cyclo</i> -(L-phenylalanine-L-phenyllactic acid) ( <b>18</b> ) .....                   | 21 |
| Figure S19. <sup>13</sup> C NMR (150 MHz, CDCl <sub>3</sub> ) spectrum of <i>cyclo</i> -(L-phenylalanine-L-phenyllactic acid) ( <b>18</b> ) .....                  | 21 |
| Figure S20. <sup>1</sup> H NMR (600 MHz, CDCl <sub>3</sub> ) spectrum of <i>cyclo</i> -(L-tryptophan-L-mandelic acid) ( <b>19</b> ) .....                          | 22 |
| Figure S21. <sup>13</sup> C NMR (150 MHz, CDCl <sub>3</sub> ) spectrum of <i>cyclo</i> -(L-tryptophan-L-mandelic acid) ( <b>19</b> ) .....                         | 22 |
| Figure S22. <sup>1</sup> H NMR (600 MHz, CDCl <sub>3</sub> ) spectrum of <i>cyclo</i> -(L-tryptophan-L-phenyllactic acid) ( <b>20</b> ) .....                      | 23 |
| Figure S23. <sup>13</sup> C NMR (150 MHz, CDCl <sub>3</sub> ) spectrum of <i>cyclo</i> -(L-tryptophan-L-phenyllactic acid) ( <b>20</b> ) .....                     | 23 |
| Figure S24. <sup>1</sup> H NMR (600 MHz, CDCl <sub>3</sub> ) spectrum of <i>cyclo</i> -(L-alanine-L-mandelic acid) ( <b>21</b> ).....                              | 24 |
| Figure S25. <sup>13</sup> C NMR (150 MHz, CDCl <sub>3</sub> ) spectrum of <i>cyclo</i> -(L-alanine-L-mandelic acid) ( <b>21</b> ) .....                            | 24 |
| Figure S26. <sup>1</sup> H NMR (600 MHz, CDCl <sub>3</sub> ) spectrum of <i>cyclo</i> -(L-alanine-L-phenyllactic acid) ( <b>22</b> ) .....                         | 25 |
| <b>Figure S27.</b> <sup>13</sup> C NMR (150 MHz, CDCl <sub>3</sub> ) spectrum of <i>cyclo</i> -(L-alanine-L-phenyllactic acid) ( <b>22</b> ) .....                 | 25 |
| Figure S28. <sup>1</sup> H NMR (600 MHz, CDCl <sub>3</sub> ) spectrum of <i>cyclo</i> -(L-tyrosine-L-mandelic acid) ( <b>23</b> ).....                             | 26 |
| Figure S29. <sup>13</sup> C NMR (150 MHz, DMSO- <i>d</i> <sub>6</sub> ) spectrum of <i>cyclo</i> -(L-tyrosine-L-mandelic acid) ( <b>23</b> ).....                  | 26 |
| Figure S30. <sup>1</sup> H NMR (600 MHz, CDCl <sub>3</sub> ) spectrum of <i>cyclo</i> -(L-tyrosine-L-phenyllactic acid) ( <b>24</b> ).....                         | 27 |
| Figure S31. <sup>13</sup> C NMR (150 MHz, CDCl <sub>3</sub> ) spectrum of <i>cyclo</i> -(L-tyrosine-L-phenyllactic acid) ( <b>24</b> ).....                        | 27 |
| Figure S32. <sup>1</sup> H NMR (600 MHz, DMSO- <i>d</i> <sub>6</sub> ) spectrum of <i>cyclo</i> -( <i>N</i> -methyl-L-tyrosine-L-mandelic acid) ( <b>25</b> )..... | 28 |
| <b>Figure S33.</b> HMBC NMR (600 MHz, DMSO- <i>d</i> <sub>6</sub> ) spectrum of <i>cyclo</i> -( <i>N</i> -methyl-L-tyrosine-L-mandelic acid) ( <b>25</b> ) .....   | 28 |
| Figure S34. <sup>1</sup> H NMR (600 MHz, CDCl <sub>3</sub> ) spectrum of <i>cyclo</i> -( <i>N</i> -methyl-L-tyrosine-L-phenyllactic acid) ( <b>26</b> ) .....      | 29 |
| Figure S35. HMBC NMR (150 MHz, CDCl <sub>3</sub> ) spectrum of <i>cyclo</i> -( <i>N</i> -methyl-L-tyrosine-L-phenyllactic acid) ( <b>26</b> ) .....                | 29 |
| Figure S36. Antibiotic screening of compounds <b>1–4</b> and <b>1a</b> (continued overleaf) .....                                                                  | 30 |
| Figure S37. Accumulation of calcein AM in P-gp-overexpressing SW620 Ad300 cells using flow cytometry .....                                                         | 32 |
| Figure S38. Cytotoxicity of compounds <b>1, 2, 4, 19, 23</b> and <b>24</b> against SW620, SW620 Ad300, KB-3-1 and KB-V1 .....                                      | 33 |

## List of Tables

|                                                                                                                                                            |    |
|------------------------------------------------------------------------------------------------------------------------------------------------------------|----|
| Table S1. 1D and 2D NMR (600 MHz, CDCl <sub>3</sub> ) data of shornephine A ( <b>1</b> ) .....                                                             | 10 |
| Table S2. 1D and 2D NMR (600 MHz, DMSO- <i>d</i> <sub>6</sub> ) data of <i>seco</i> -shornephine A methyl ester ( <b>1a</b> ) .....                        | 11 |
| Table S3. 1D and 2D NMR (600 MHz, CDCl <sub>3</sub> ) data of 15b-β-hydroxyl-5- <i>N</i> -acetyladreemin ( <b>2</b> ) .....                                | 12 |
| Table S4. 1D and 2D NMR (600 MHz, CDCl <sub>3</sub> ) data of 5- <i>N</i> -acetyladreemin ( <b>3</b> ) .....                                               | 13 |
| Table S5. 1D and 2D NMR (600 MHz, CDCl <sub>3</sub> ) of 15b-β-methoxy-5- <i>N</i> -acetylardeemin ( <b>4</b> ) .....                                      | 14 |
| Table S6. Cytotoxicity of compounds and their effects on accumulation of calcein AM in P-gp overexpressing SW620<br>Ad300 cells using flow cytometry ..... | 32 |

# 1 DNA Taxonomic Analysis of CMB-M081F

## 1.1 ITS Gene Sequence of CMB-M081F

```
CAGGGATCATTTGTTGAGTTTTACTGATTGCAAAGAATCACACTCAGACTGCAAGCTTTCAGAACAG
GGTTCATGTTGGGGTCTCCGGCGGGCACGGGCCCGGGGGCGAGTCGCCCCCGGGCGGCCAGCAACG
CTGGCGGGCCCGCCGAAGCAACAAGGTACAATAGTCACGGGTGGGAGGTTGGGCCATAAAGACCCG
CACTCGGTAATGATCCTTCCGCAGTTCACCCTACGGAAG
```

### BLAST search (closest match):

Aspergillus terreus strain CO1 18S ribosomal RNA gene, partial sequence; internal transcribed spacer 1, 5.8S ribosomal RNA gene, and internal transcribed spacer 2, complete sequence; and 28S ribosomal RNA gene, partial sequence

Sequence ID: [gb|KC582297.1](#) Length: 583 Number of Matches: 1

| Score         | Expect                                                      | Identities   | Gaps      | Strand     |
|---------------|-------------------------------------------------------------|--------------|-----------|------------|
| 407 bits(220) | 2e-110                                                      | 233/238(98%) | 5/238(2%) | Plus/Minus |
| Query 5       | GAT-CATTGTTG--AGTTTT-ACTGATTGCAAAGAATCACACTCAGACTGCAAGCTTTC | 60           |           |            |
| Sbjct 239     | GATCCATTGTTGAAAGTTTTAACTGATTGCAAAGAATCACACTCAGACTGCAAGCTTTC | 180          |           |            |
| Query 61      | GAACAGGGTTCATGTTGGGGTCTCCGGCGGGCACGGGCCCGGGGGCGAGTCGCCCCCGG | 120          |           |            |
| Sbjct 179     | GAACAGGGTTCATGTTGGGGTCTCCGGCGGGCACGGGCCCGGGGGCGAGTCGCCCCCGG | 120          |           |            |
| Query 121     | CGGCCAGCAACGCTGGCGGGCCCGCGAAGCAACAGGTACAATAGTCACGGGTGGGAGG  | 180          |           |            |
| Sbjct 119     | CGGCCAGCAACGCTGGCGGGCCCGCGAAGCAACAGGTACAATAGTCACGGGTGGGAGG  | 60           |           |            |
| Query 181     | TTGGGCCATAAAGACCCGCACTCGGTAATGATCCTTCCGCAG-TTCACCCTACGGAAG  | 237          |           |            |
| Sbjct 59      | TTGGGCCATAAAGACCCGCACTCGGTAATGATCCTTCCGCAGGTTACCCCTACGGAAG  | 2            |           |            |

[Related Information](#)

### Aspergillus terreus strain CO1 18S ribosomal RNA gene, partial sequence; internal transcribed spacer 1, 5.8S ribosomal RNA gene, and internal transcribed spacer 2, complete sequence; and 28S ribosomal RNA gene, partial sequence

GenBank: KC582297.1

[FASTA](#) [Graphics](#)

Go to:

LOCUS KC582297 583 bp DNA linear PLN 19-MAY-2013  
DEFINITION Aspergillus terreus strain CO1 18S ribosomal RNA gene, partial sequence; internal transcribed spacer 1, 5.8S ribosomal RNA gene, and internal transcribed spacer 2, complete sequence; and 28S ribosomal RNA gene, partial sequence.  
ACCESSION KC582297  
VERSION KC582297.1 GI:499109366  
KEYWORDS .  
SOURCE Aspergillus terreus  
ORGANISM [Aspergillus terreus](#)  
Eukaryota; Fungi; Dikarya; Ascomycota; Pezizomycotina; Eurotiomycetes; Eurotiomycetidae; Eurotiales; Trichocomaceae; mitosporic Trichocomaceae; Aspergillus.  
REFERENCE 1 (bases 1 to 583)  
AUTHORS Suja,M., Vasuki,S. and Sajitha,N.  
TITLE Isolation of endophytic fungi from Seaweeds  
JOURNAL Unpublished  
REFERENCE 2 (bases 1 to 583)  
AUTHORS Suja,M., Vasuki,S. and Sajitha,N.  
TITLE Direct Submission  
JOURNAL Submitted (06-FEB-2013) CAS in Marine Biology, Faculty of Marine Sciences, Annamalai University, Parangipettai, Cuddalore, Tamilnadu 608502, India

## 2 Cytotoxicity (MTT) Assays

The MTT 3-(4,5-dimethylthiazol-2-yl)-2,5-diphenyltetrazolium bromide assay was modified from that previously described<sup>1</sup> using adherent cell lines SW620 and KB-3-1, and their respective P-gp over-expressing daughter cell lines SW620 Ad300 and KB-V1. Briefly, cells were harvested with trypsin and dispensed into 96-well microtiter assay plates at 2,000 cells/well for SW620, SW620 Ad300 and KB-3-1, and 5,000 cells/well for KB-V1, then incubated for 18 h at 37 °C with 5% CO<sub>2</sub> (to allow cells to attach). Test compounds were dissolved in 5% DMSO in PBS (v/v) and aliquots (20 µL) tested over a series of final concentrations ranging from 10 nM to 30 µM. Control wells were treated with 5% aqueous DMSO. After 68 h incubation at 37 °C with 5% CO<sub>2</sub>, an aliquot (20 µL) of MTT in PBS (4 mg/mL) was added to each well (final concentration of 0.4 mg/mL), and the microtiter plates incubated for a further 4 h at 37 °C with 5% CO<sub>2</sub>. After this final incubation the medium was aspirated and precipitated formazan crystals dissolved in DMSO (100 µL/well). The absorbance of each well was measured at 580 nm and IC<sub>50</sub> values were calculated as the concentration of analyte required for 50% inhibition of cancer cell growth (compared to negative controls). All experiments were performed in duplicate.

## 3 Chromatograms

### 3.1 HPLC-DAD chromatogram of CMB-M081F M1 agar plate extract

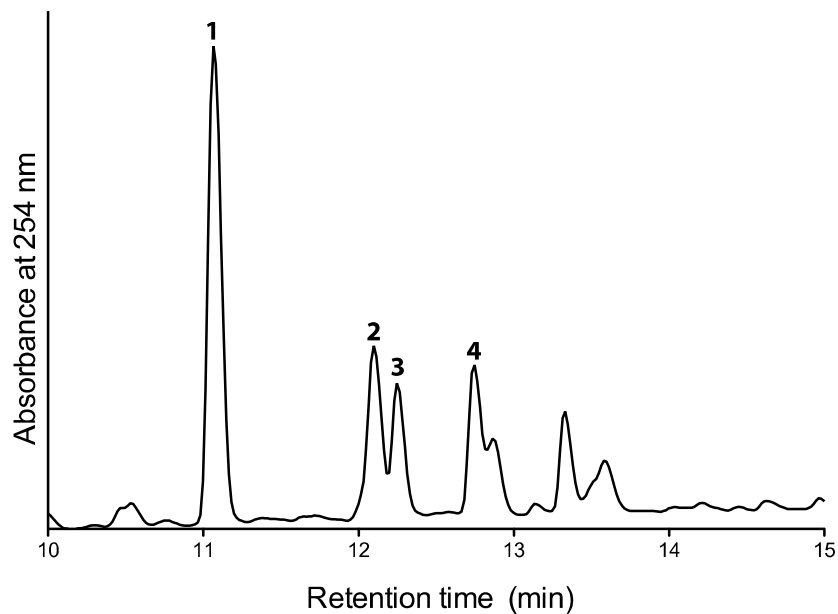

**Figure S1.** Expansion of HPLC-DAD (254 nm) chromatogram of the crude extract CMB-M81F highlighting the DKM 1 and DKPs 2–4.

### 3.2 HPLC-DAD-ESIMS chromatograms of Mosher esters

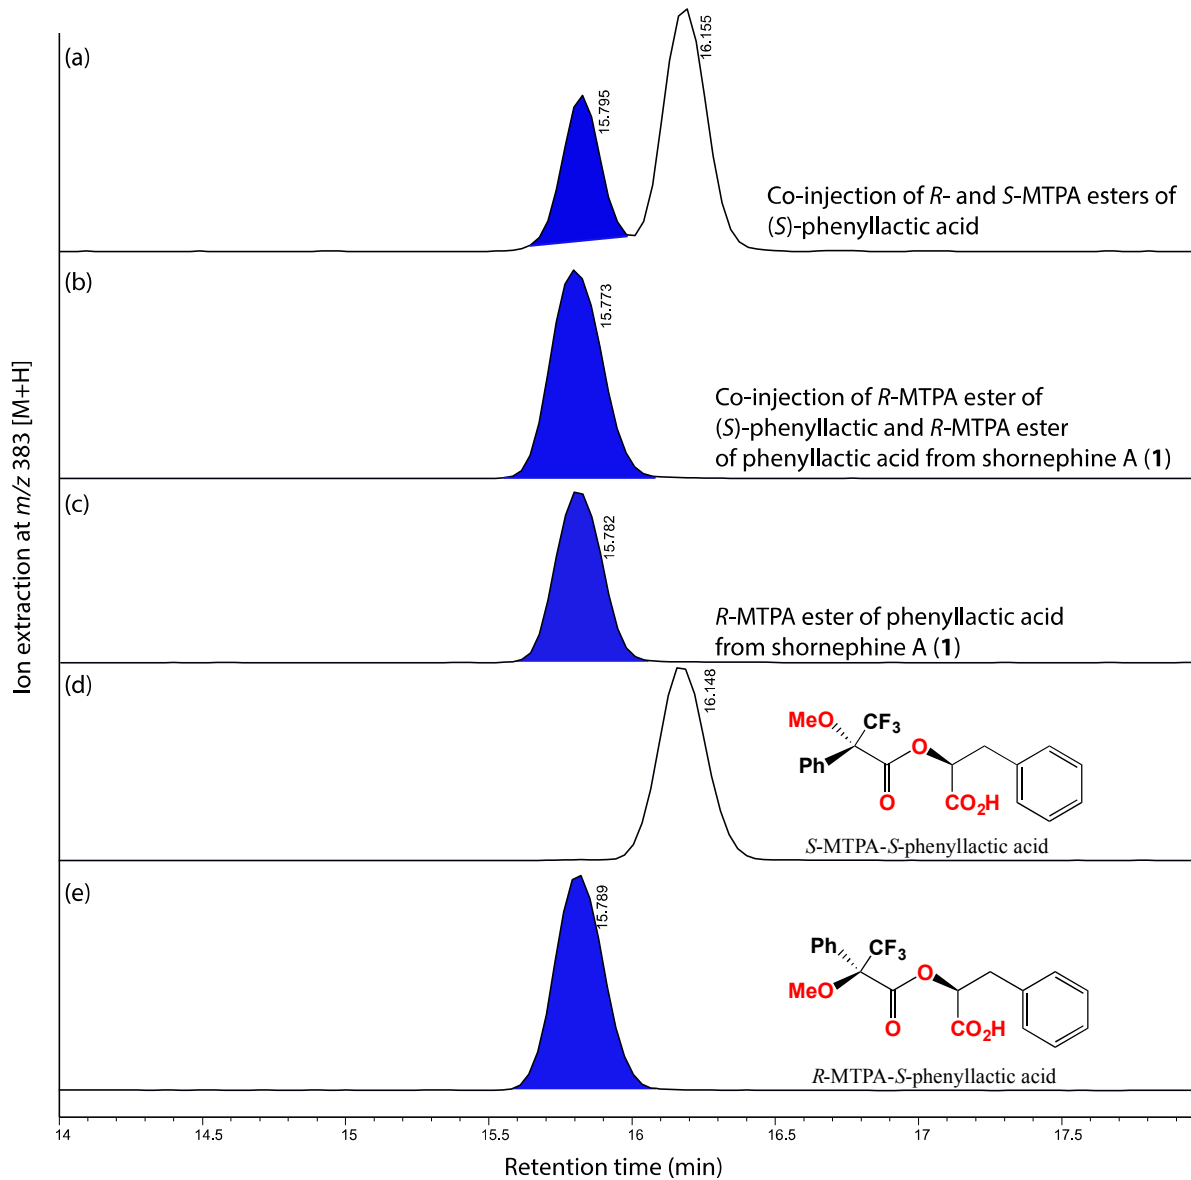

**Figure S2.** Analytical HPLC (Zorbax SB-C<sub>8</sub> 5  $\mu$ m 150  $\times$  4.6 mm column, 1.0 mL/min, gradient elution from 90% H<sub>2</sub>O:MeCN to 100% MeCN over 15 min followed by a 5 min hold at 100% MeCN, with isocratic 0.05% HCO<sub>2</sub>H in MeCN modifier), monitoring single ion extractions at  $m/z$  383 [M+H]<sup>+</sup> for the Mosher ester of phenyllactic acid). (a) Co-injection of *R*- and *S*-MTPA esters of authentic (*S*)-phenyllactic acid, (b) Co-injection of *R*-MTPA ester of authentic (*S*)-phenyllactic acid with the *R*-MTPA ester of phenyllactic acid recovered from hydrolysis of shornephine A (**1**), (c) *R*-MTPA ester of phenyllactic acid recovered from hydrolysis of shornephine A (**1**) (d) *S*-MTPA ester of authentic (*S*)-phenyllactic acid and (e) *R*-MTPA ester of authentic (*S*)-phenyllactic acid.

### 3.3 Methanolysis of shornephine A (**1**)

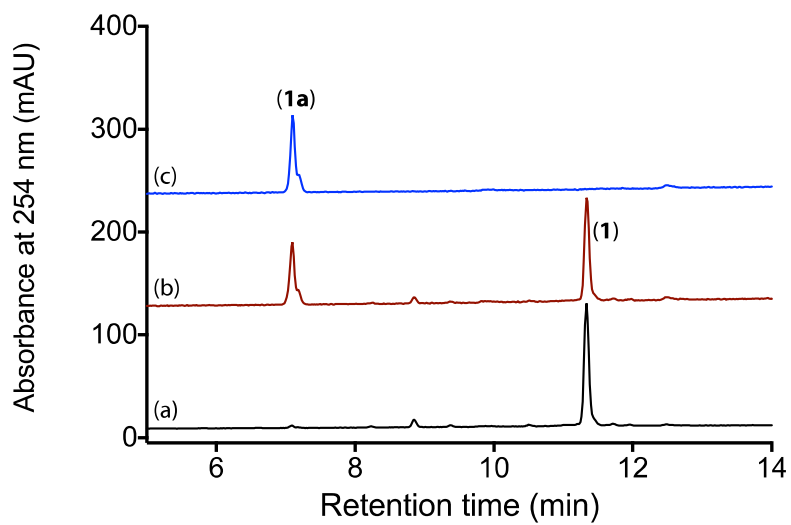

**Figure S3.** HPLC-DAD (254 nm) chromatogram of shornephine A (**1**) after incubation in MeOH for (a) 30 min, (b) 8 h and (c) 24 h (100% conversion to **1a**)

### 3.4 Methanolysis of *cyclo*-(L-phenylalanine-L-mandelic acid) (**17**)

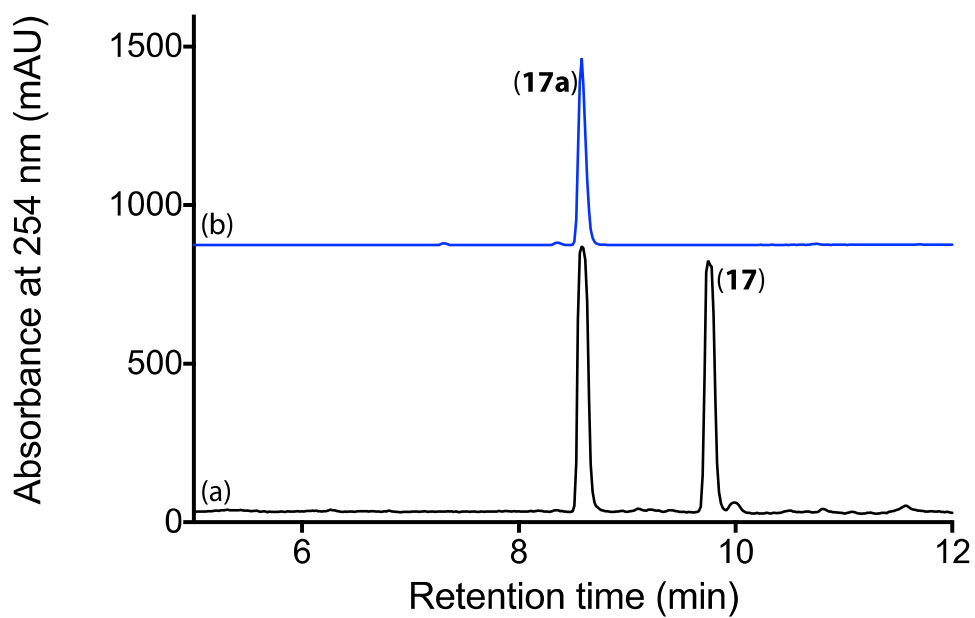

**Figure S4.** HPLC-DAD (254 nm) chromatogram of *cyclo*-(L-phenylalanine-L-mandelic acid) (**17**) after incubation in MeOH for (a) 30 min and (b) 1 h (100% conversion to **17a**)



### 3.5 Methanolysis of *cyclo*-(*N*-methyl-L-tyrosine-L-phenyllactic acid) (**26**)

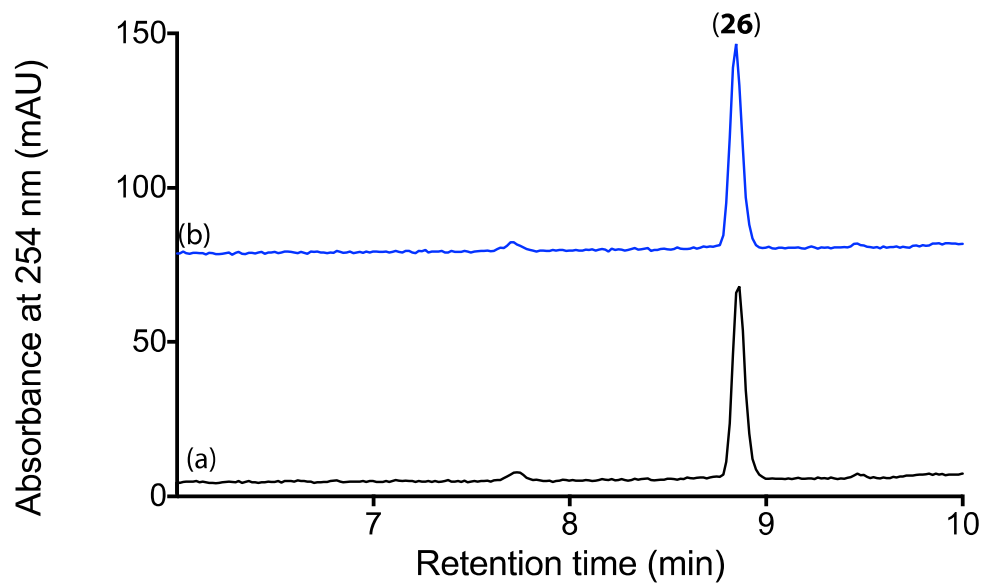

**Figure S5.** HPLC-DAD (254 nm) chromatogram of *cyclo*-(*N*-methyl-L-tyrosine-L-phenyllactic acid) (**26**) after incubation in MeOH for (a) 3 h and (b) 24 h.

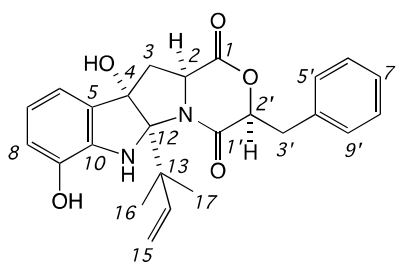

**Table S1.** 1D and 2D NMR (600 MHz, CDCl<sub>3</sub>) data of shornephine A (**1**)

| pos   | $\delta_{\text{H}}$ , mult, ( <i>J</i> in Hz) | $\delta_{\text{C}}^{\text{a}}$ | COSY               | ROESY     | <sup>1</sup> H – <sup>13</sup> C HMBC |
|-------|-----------------------------------------------|--------------------------------|--------------------|-----------|---------------------------------------|
| 1     |                                               | 167.7                          |                    |           |                                       |
| 2     | 4.32, d (11.1)                                | 57.3                           | 3a/b               | 2', 16/17 | 1, 3, 4                               |
| 3     | a 3.26, d (13.7)<br>b 2.81, dd (13.7, 11.1)   | 36.9                           | 2, 3b<br>2, 3a     |           | 1, 2, 4, 5, 12<br>1, 2, 4, 5          |
| 4     |                                               | 88.5                           |                    |           |                                       |
| 4-OH  | 2.07, br s                                    |                                |                    | 3b        | 3, 4                                  |
| 5     |                                               | 131.5                          |                    |           |                                       |
| 6     | 6.91, d (7.7)                                 | 117.1                          | 7                  | 3a        | 4, 7, 10                              |
| 7     | 6.69 <sup>b</sup> , m                         | 117.3 <sup>e</sup>             | 8                  |           | 5, 9                                  |
| 8     | 6.67 <sup>b</sup> , m                         | 121.2 <sup>e</sup>             | 6, 7               |           | 7, 10                                 |
| 6     | 6.91, d (7.7)                                 | 117.1                          | 7                  | 3a        | 4, 7, 10                              |
| 9     |                                               | 141.4                          |                    |           |                                       |
| 9-OH  | <sup>d</sup>                                  |                                |                    |           |                                       |
| 10    |                                               | 135.9                          |                    |           |                                       |
| 11-NH | 6.34, s                                       |                                |                    | 16, 17    | 4, 5                                  |
| 12    |                                               | 94.9                           |                    |           |                                       |
| 13    |                                               | 44.9                           |                    |           |                                       |
| 14    | 6.39, dd (17.3, 10.6)                         | 144.1                          | 15a/b              | 3b, 16/17 | 13, 16/17                             |
| 15    | a 5.18, d (17.3)<br>b 5.11, d (10.6)          | 113.1                          | 14, 15b<br>14, 15a | 16/17     | 13, 14<br>13, 14                      |
| 16    | 1.38, s                                       | 22.9                           |                    | 2, 14     | 12, 13, 14                            |
| 17    | 1.38, s                                       | 25.8                           |                    | 2, 14     | 12, 13, 14                            |
| 1'    |                                               | 165.9                          |                    |           |                                       |
| 2'    | 4.76, dd (8.8, 1.6)                           | 78.5                           | 3'a/b              | 2, 3'a    | 3', 4'                                |
| 3'    | a 3.32, d (15.1)<br>b 2.92, dd (15.1, 8.8)    | 34.4                           | 2', 3'b<br>2', 3'a | 2'        | 4', 5'/9'<br>1', 2', 4', 5'/9'        |
| 4'    |                                               | 136.2                          |                    |           |                                       |
| 5'/9' | 7.20 <sup>b</sup>                             | 126.7 <sup>f</sup>             |                    |           |                                       |
| 6'/8' | 7.20 <sup>b</sup>                             | 129.3 <sup>f</sup>             |                    |           |                                       |
| 7'    | 7.20 <sup>b</sup>                             | 128.5                          |                    |           |                                       |

<sup>a</sup> <sup>13</sup>C NMR assignments supported by gHSQC and gHMBC data.

<sup>b,c</sup> overlapping signals.

<sup>d</sup> not observed.

<sup>e,f</sup> assignments are interchangeable

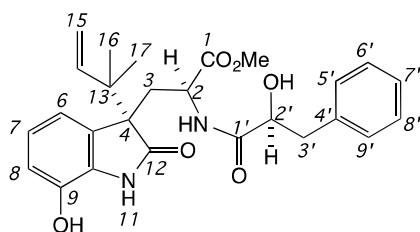

**Table S2.** 1D and 2D NMR (600 MHz, DMSO-*d*<sub>6</sub>) data of *seco*-shornepine A methyl ester (**1a**)

| pos   | $\delta_{\text{H}}$ , mult, ( <i>J</i> in Hz)      | $\delta_{\text{C}}^{\text{a}}$ | COSY               | ROESY             | $^1\text{H} - ^{13}\text{C}$ HMBC        |
|-------|----------------------------------------------------|--------------------------------|--------------------|-------------------|------------------------------------------|
| 1     |                                                    | 172.5                          |                    |                   |                                          |
| 1-OMe | 3.38, s                                            | 52.1                           |                    |                   | 1                                        |
| 2     | 3.79, ddd, (9.7, 8.0, 5.4)                         | 49.8                           | 3a/b, 2-NH         | 2-NH, 6           | 1, 1', 3                                 |
| 2-NH  | 7.35, d, (8.0)                                     |                                | 2                  | 2, 2', 3b         | 1', 2                                    |
| 3     | a 2.32, dd, (14.2, 5.4)<br>b 2.24, dd, (14.2, 9.7) | 32.8                           | 3b, 2<br>3a, 2     | 6<br>2-NH         | 1, 2, 4, 5, 12, 13<br>1, 2, 4, 5, 12, 13 |
| 4     |                                                    | 55.8                           |                    |                   |                                          |
| 5     |                                                    | 130.0                          |                    |                   |                                          |
| 6     | 6.56, d, (7.4)                                     | 117.0                          | 7                  | 2, 3a, 14, 16, 17 | 4, 8, 10                                 |
| 7     | 6.78, dd, (8.0, 7.4)                               | 121.4                          | 6, 8               |                   | 5, 9                                     |
| 8     | 6.70, d, (8.0)                                     | 115.6                          | 7                  |                   | 6, 9, 10                                 |
| 9     |                                                    | 141.5                          |                    |                   |                                          |
| 9-OH  | 9.50, br s                                         |                                |                    |                   |                                          |
| 10    |                                                    | 131.0                          |                    |                   |                                          |
| 11-NH | 10.20, br s                                        |                                |                    |                   |                                          |
| 12    |                                                    | 179.7                          |                    |                   |                                          |
| 13    |                                                    | 42.3                           |                    |                   |                                          |
| 14    | 6.04, dd, (17.4, 10.8)                             | 143.5                          | 15a/b              | 6, 16, 17         | 13, 17                                   |
| 15    | a 5.07, dd, (10.8, 0.6)<br>b 4.99, dd, (17.4, 0.6) | 113.8                          | 14<br>14           |                   | 13<br>13, 14                             |
| 16    | 1.01, s                                            | 22.1                           |                    | 6, 14             | 4, 13, 14, 17                            |
| 17    | 0.93, s                                            | 21.8                           |                    | 6, 14             | 4, 13, 14, 16                            |
| 1'    |                                                    | 173.5                          |                    |                   |                                          |
| 2'    | 3.90, dd, (9.6, 3.3)                               | 72.5                           | 3'a/b              | 2-NH              | 1'                                       |
| 2'-OH | 5.53, br s                                         |                                | 2'                 |                   |                                          |
| 3'    | a 2.79, dd, (13.8, 3.3)<br>b 2.61, dd, (13.8, 9.6) | 40.4                           | 2', 3'b<br>2', 3'a |                   | 2', 4', 5'/9'<br>2', 4', 5'/9'           |
| 4'    |                                                    | 138.8                          |                    |                   |                                          |
| 5'/9' | 7.22, d, (7.2)                                     | 129.7                          | 6'/8'              |                   | 5'/9', 7'                                |
| 6'/8' | 7.26, ddd, (7.2, 7.2, 0.6)                         | 128.2                          | 5'/9', 7'          |                   | 6'/8', 4'                                |
| 7'    | 7.18, td, (7.2, 0.6)                               | 126.3                          | 6'/8'              |                   | 5'/9'                                    |

<sup>a</sup><sup>13</sup>C NMR assignments supported by gHSQC and gHMBC data.

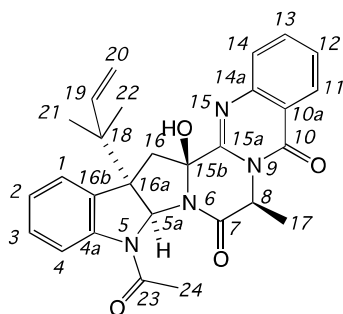

**Table S3.** 1D and 2D NMR (600 MHz, CDCl<sub>3</sub>) data of 15b-β-hydroxyl-5-N-acetyladreemin (**2**)<sup>2</sup>

| pos    | $\delta_{\text{H}}$ , mult, ( <i>J</i> in Hz)     | $\delta_{\text{C}}$ <sup>a</sup> | COSY              | ROESY                | <sup>1</sup> H – <sup>13</sup> C HMBC |
|--------|---------------------------------------------------|----------------------------------|-------------------|----------------------|---------------------------------------|
| 1      | 7.42, d (7.5)                                     | 124.4                            | 2                 |                      | 3, 16b                                |
| 2      | 7.21, dd (7.5, 7.5)                               | 124.9                            | 1, 3              |                      | 1, 3, 4, 4a, 16b                      |
| 3      | 7.45, dd (7.5, 7.5)                               | 130.2                            | 2, 4              |                      | 1, 16b                                |
| 4      | 8.07, br s                                        | <sup>b</sup>                     | 3                 |                      |                                       |
| 4a     |                                                   | 142.5                            |                   |                      |                                       |
| 5a     | 6.04, br s                                        | 80.2                             |                   | 21, 22, 24           |                                       |
| 7      |                                                   | 168.4                            |                   |                      |                                       |
| 8      | 5.34, q (7.1)                                     | 53.5                             | 17                |                      | 7, 10, 15a, 17                        |
| 10     |                                                   | 160.1                            |                   |                      |                                       |
| 10a    |                                                   | 120.7                            |                   |                      |                                       |
| 11     | 8.27, d (7.5)                                     | 127.1                            | 12                |                      | 10, 12, 14a                           |
| 12     | 7.77, dd (7.5, 7.5)                               | 128.3                            | 11, 13            |                      | 10a, 11                               |
| 13     | 7.51, dd (8.1, 7.5)                               | 134.9                            | 12, 14            |                      | 11, 14a                               |
| 14     | 7.72, d (8.1)                                     | 127.8                            | 13                |                      | 10, 10a, 13                           |
| 15a    |                                                   | 150.6                            |                   |                      |                                       |
| 15b    |                                                   | 89.2                             |                   |                      |                                       |
| 16     | $\alpha$ 3.15, d (14.8)<br>$\beta$ 3.06, d (14.8) | 43.8                             |                   | 21, 22<br>21, 22     | 15a, 15b, 18<br>5a, 15b               |
| 16a    |                                                   | 59.4                             |                   |                      |                                       |
| 16b    |                                                   | 133.3                            |                   |                      |                                       |
| 17     | 1.64, d (7.1)                                     | 18.3                             | 8                 |                      | 7, 8                                  |
| 18     |                                                   | 40.5                             |                   |                      |                                       |
| 19     | 5.78, dd (17.0, 10.9)                             | 143.4                            | 20 $\alpha,\beta$ | 16 $\alpha$ , 21, 22 | 18, 22                                |
| 20     | $\alpha$ 5.13, d (10.9)<br>$\beta$ 5.11, d (17.0) | 115.9                            | 19                | 21, 22<br>21, 22     | 18, 19<br>18, 19                      |
| 21     | 0.98, s                                           | 22.6                             | 22                | 5a, 19               | 18, 19, 22                            |
| 22     | 1.17, s                                           | 22.8                             | 21                | 5a, 19               | 18, 19, 21                            |
| 23     |                                                   | 170.8                            |                   |                      |                                       |
| 24     | 2.65, br s                                        | 23.6                             |                   | 21, 22               | 23                                    |
| 15b-OH | 2.21, br s                                        |                                  |                   |                      | 15a                                   |

<sup>a</sup> <sup>13</sup>C NMR assignments supported by gHSQC and gHMBC data

<sup>b</sup> not observed

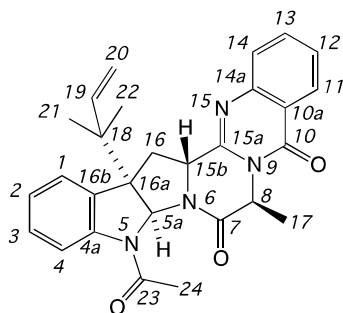

**Table S4.** 1D and 2D NMR (600 MHz, CDCl<sub>3</sub>) data of 5-*N*-acetyladremin (**3**)<sup>2</sup>

| pos | $\delta_{\text{H}}$ , mult, ( <i>J</i> in Hz)              | $\delta_{\text{C}}^{\text{a}}$ | COSY                                | ROESY                      | <sup>1</sup> H – <sup>13</sup> C HMBC |
|-----|------------------------------------------------------------|--------------------------------|-------------------------------------|----------------------------|---------------------------------------|
| 1   | 7.39, d (7.8)                                              | 124.7                          | 2                                   |                            | 4, 16                                 |
| 2   | 7.18, dd (7.8, 7.8)                                        | 124.5                          | 1, 3                                |                            | 4                                     |
| 3   | 7.36, dd (7.8, 7.2)                                        | 130.1                          | 2, 4                                |                            | 1, 4a                                 |
| 4   | 8.03, br s                                                 | 121.2                          | 3                                   |                            | 2                                     |
| 4a  |                                                            | 142.2                          |                                     |                            |                                       |
| 5a  | 6.04, br s                                                 | 81.2                           |                                     | 16 $\beta$ , 21, 22        | 16, 18                                |
| 7   |                                                            | 169.1                          |                                     |                            |                                       |
| 8   | 5.41, q (7.2)                                              | 53.6                           | 17                                  |                            | 7                                     |
| 10  |                                                            | 160.1                          |                                     |                            |                                       |
| 10a |                                                            | 121.2                          |                                     |                            |                                       |
| 11  | 8.27, dd (7.8, 1.2)                                        | 127.8                          | 12                                  |                            |                                       |
| 12  | 7.50, dd (7.8, 7.2)                                        | 127.5                          | 11, 13                              |                            | 10a                                   |
| 13  | 7.72, ddd (8.4, 7.2, 1.2)                                  | 135.2                          | 12, 14                              |                            | 14a                                   |
| 14  | 7.66, d (8.4)                                              | 126.3                          | 13                                  |                            |                                       |
| 14a |                                                            | 149.4                          |                                     |                            |                                       |
| 15a |                                                            | 151.1                          |                                     |                            |                                       |
| 15b | 4.41, dd (10.3, 5.5)                                       | 90.2                           | 16 $\alpha$ , $\beta$               | 16 $\alpha$ , $\beta$ , 17 | 15a                                   |
| 16a |                                                            | 60.1                           |                                     |                            |                                       |
| 16b |                                                            | 132.3                          |                                     |                            |                                       |
| 16  | $\alpha$ 3.02, dd (12.8, 5.5)<br>$\beta$ 2.69 <sup>b</sup> | 59.2                           | 15b, 16 $\beta$<br>15b, 16 $\alpha$ |                            | 18<br>18                              |
| 17  | 1.44, d (7.2)                                              | 19.1                           | 8                                   | 15b                        |                                       |
| 18  |                                                            | 41.2                           |                                     |                            |                                       |
| 19  | 5.85, dd (17.4, 11.0)                                      | 145.3                          | 20 $\alpha$ , $\beta$               | 16 $\beta$ , 21, 22        |                                       |
| 20  | $\alpha$ 5.12 d (17.4)<br>$\beta$ 5.11, d (11.0)           | 115.1                          | 19, 20 $\beta$<br>19, 20 $\alpha$   | 21, 22                     | 21, 22<br>21, 22                      |
| 21  | 1.21, s                                                    | 22.1                           | 22                                  |                            | 4a, 18, 20                            |
| 22  | 1.03, s                                                    | 22.3                           | 21                                  |                            | 4a, 18, 20                            |
| 23  |                                                            | 171.4                          |                                     |                            |                                       |
| 24  | 2.67, s                                                    | 23.6                           |                                     |                            |                                       |

<sup>a</sup> <sup>13</sup>C NMR assignments supported by gHSQC and gHMBC data.

<sup>b</sup> Overlapping signal

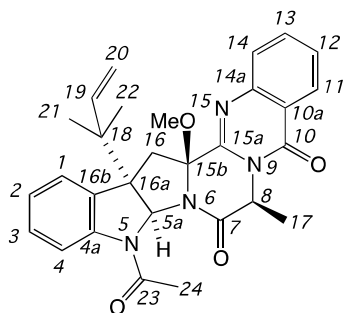

**Table S5.** 1D and 2D NMR (600 MHz, CDCl<sub>3</sub>) of 15b-β-methoxy-5-N-acetylardeemin (**4**)

| pos     | $\delta_{\text{H}}$ , mult, ( <i>J</i> in Hz) | $\delta_{\text{C}}^{\text{a}}$ | COSY       | ROESY           | <sup>1</sup> H – <sup>13</sup> C HMBC |
|---------|-----------------------------------------------|--------------------------------|------------|-----------------|---------------------------------------|
| 1       | 7.35, d (7.8)                                 | 123.8                          | 2          | 16β             | 3, 4a                                 |
| 2       | 7.13, dd (7.8, 0.6)                           | 123.9                          | 1, 3       |                 | 4                                     |
| 3       | 7.31, dd (7.8, 0.6)                           | 128.5                          | 2, 4       |                 | 1, 4a                                 |
| 4       | 7.98, br d (7.8)                              | 119.5                          | 3          |                 |                                       |
| 4a      |                                               | 143.0                          |            |                 |                                       |
| 5a      | 6.10, br s                                    | 80.5                           |            | 24              |                                       |
| 7       |                                               | 168.0                          |            |                 |                                       |
| 8       | 5.29, q, (6.6)                                | 54.9                           | 17         |                 | 7, 15a, 17                            |
| 10      |                                               | 160.0                          |            |                 |                                       |
| 10a     |                                               | 120.8                          |            |                 |                                       |
| 11      | 8.29, d (7.8)                                 | 126.9                          | 12         |                 | 10, 13, 14a                           |
| 12      | 7.54, dd (7.8, 1.8)                           | 127.9                          | 11, 13     |                 | 10a, 14                               |
| 13      | 7.80, dd (7.8, 1.8)                           | 134.8                          | 12, 14     |                 | 11, 14a                               |
| 14      | 7.75, d (7.8)                                 | 127.9                          | 13         |                 | 10a, 12                               |
| 14a     |                                               | 146.3                          |            |                 |                                       |
| 15a     |                                               | 148.1                          |            |                 |                                       |
| 15b     |                                               | 92.7                           |            |                 |                                       |
| 15b-OMe | 2.70, s                                       | 52.1                           |            | 16α, 17         | 15b                                   |
| 16      | α 3.15, d (14.4)<br>β 2.79, d (14.4)          | 37.4                           | 16β<br>16α | 1, 21, 22<br>19 | 5a, 15b<br>15a, 18                    |
| 16a     |                                               | 59.1                           |            |                 |                                       |
| 16b     |                                               | 134.2                          |            |                 |                                       |
| 17      | 1.64, d (6.6)                                 | 18.9                           | 8          | 15b-OMe         | 7, 8                                  |
| 18      |                                               | 40.9                           |            |                 |                                       |
| 19      | 5.85, dd (17.5, 10.8)                         | 143.3                          | 20α, β     | 16b             |                                       |
| 20      | α 5.12, d (17.5)<br>β 5.11, d (10.8)          | 114.9                          | 19<br>19   |                 | 18<br>18                              |
| 21      | 1.20, s                                       | 22.6                           |            | 16α             | 18, 19, 22                            |
| 22      | 1.01, s                                       | 23.3                           |            | 16α             | 18, 19, 21                            |
| 23      |                                               |                                |            |                 |                                       |
| 24      | 2.66, br s                                    | 23.9                           |            | 5a              |                                       |

<sup>a</sup> <sup>13</sup>C NMR assignments supported by gHSQC and gHMBC data

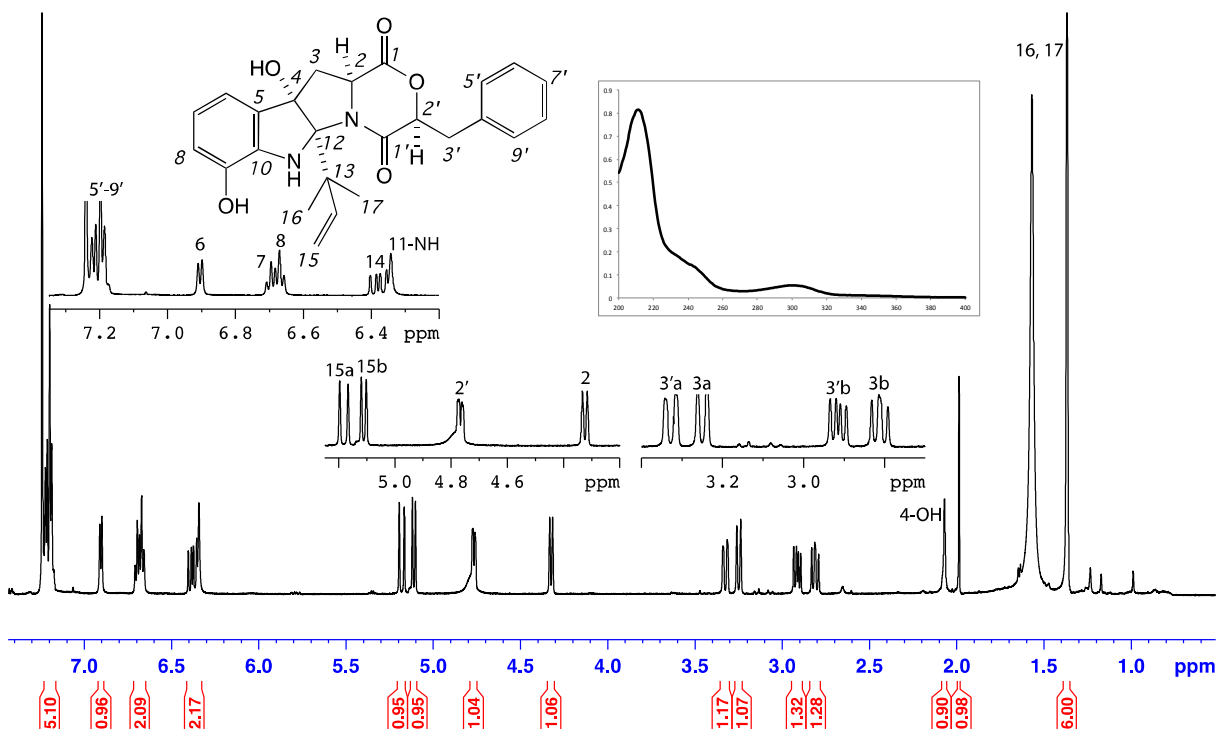

**Figure S6.**  $^1\text{H}$  NMR (600 MHz,  $\text{CDCl}_3$ ) and UV-vis spectra of shornephine A (1)

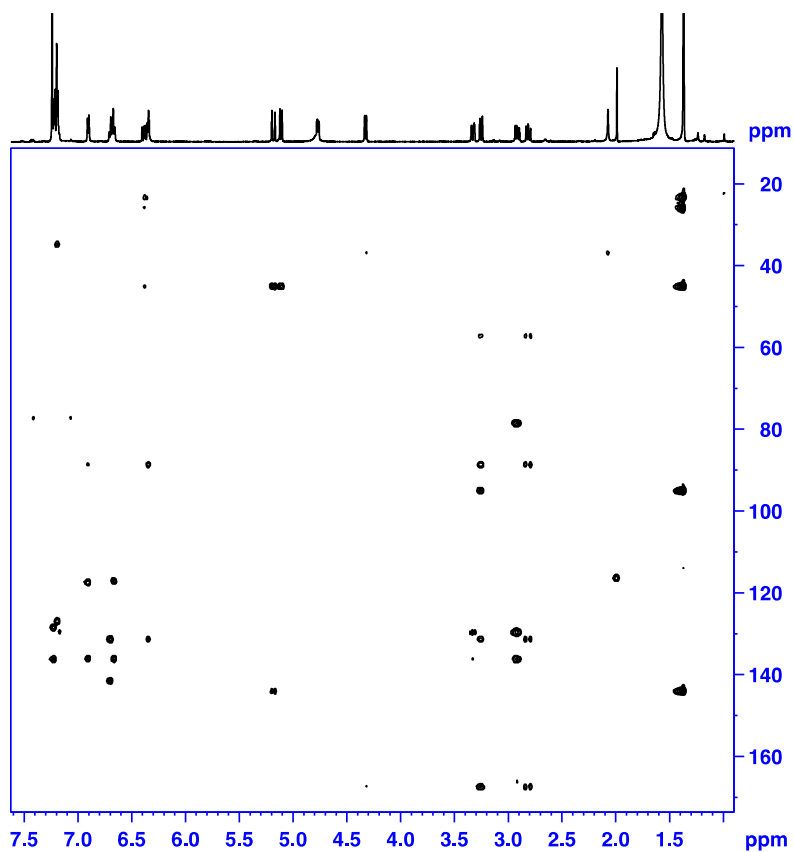

**Figure S7.** HMBC NMR (600 MHz,  $\text{CDCl}_3$ ) spectrum of shornephine A (1)

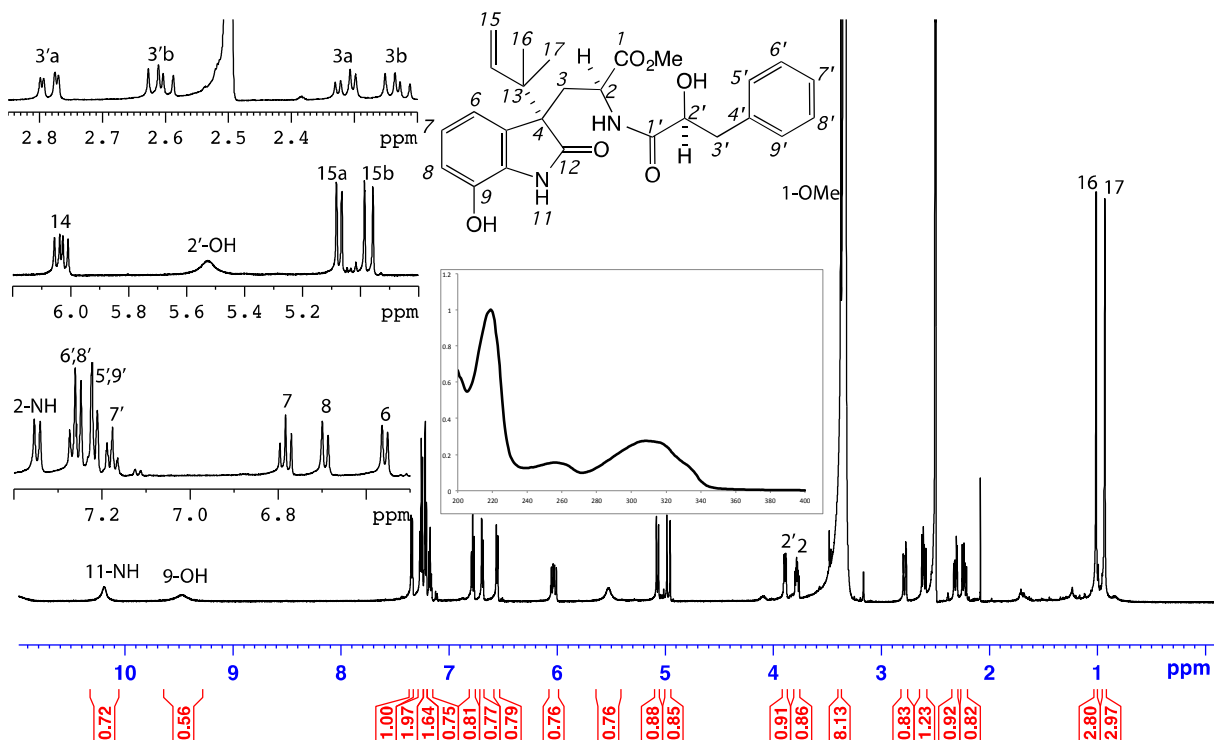

**Figure S8.**  $^1\text{H}$  NMR (600 MHz,  $\text{DMSO}-d_6$ ) and UV-vis spectra of *seco*-shornephine A methyl ester (**1a**)

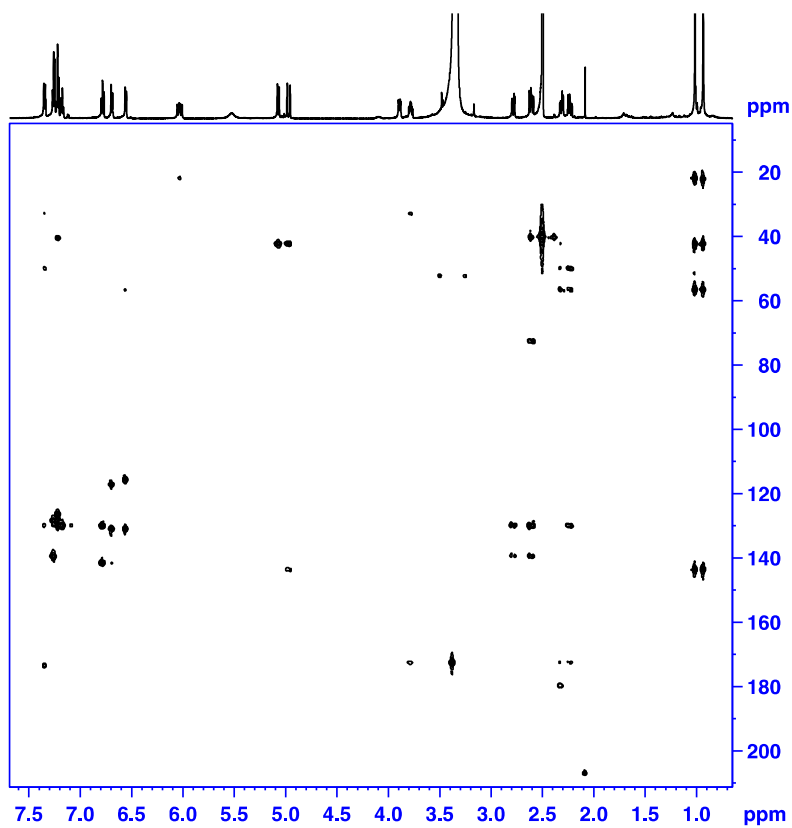

**Figure S9.** HMBC NMR (600 MHz,  $\text{DMSO}-d_6$ ) spectrum of *seco*-shornephine A methyl ester (**1a**)



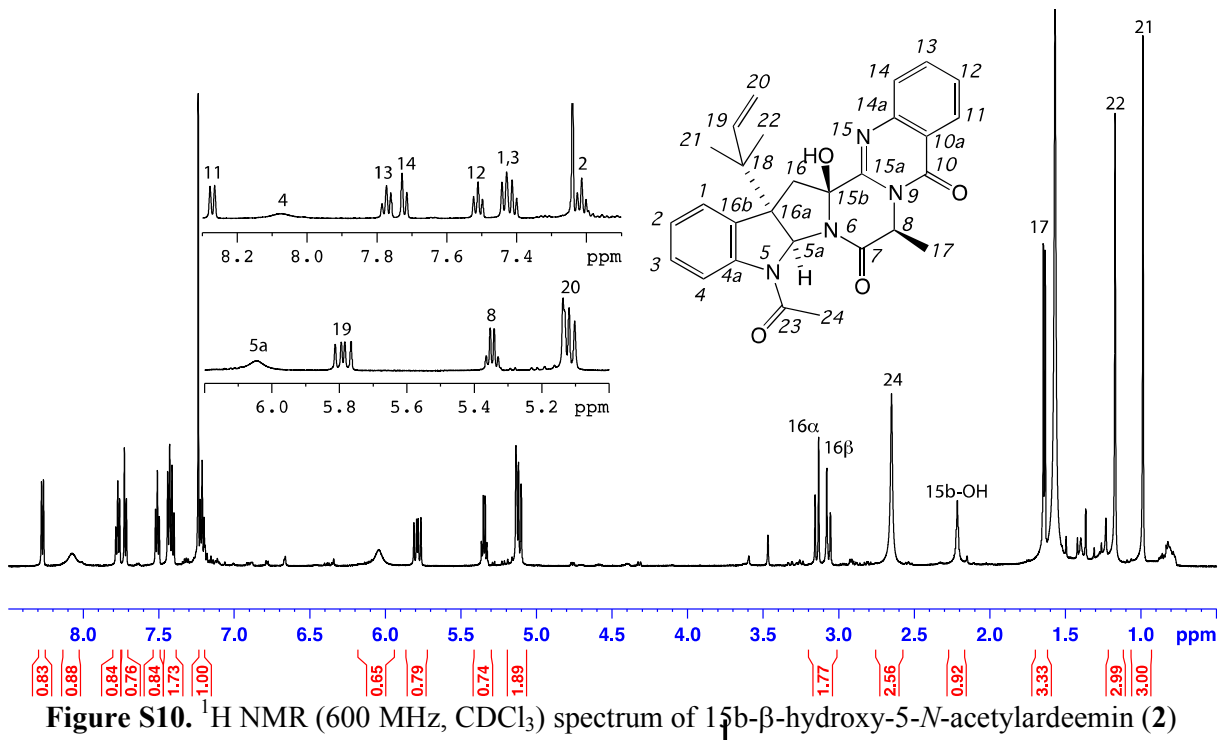

Figure S10. <sup>1</sup>H NMR (600 MHz, CDCl<sub>3</sub>) spectrum of 15b-β-hydroxy-5-N-acetylardeemin (2)

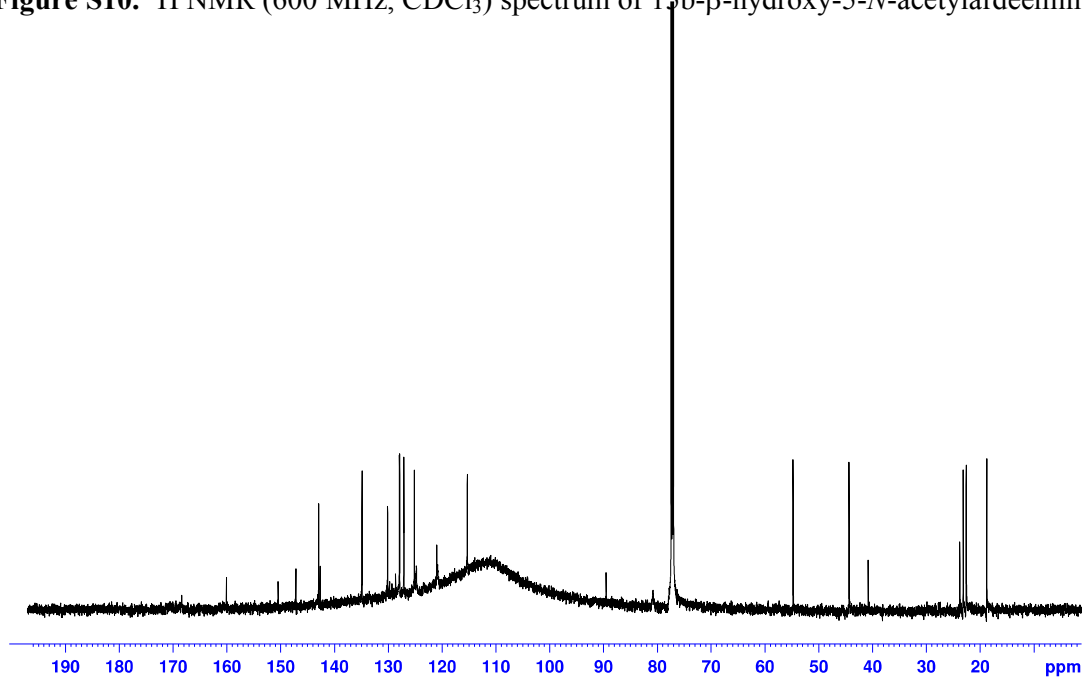

Figure S11. <sup>13</sup>C NMR (150 MHz, CDCl<sub>3</sub>) spectrum of 15b-β-hydroxy-5-N-acetylardeemin (2)

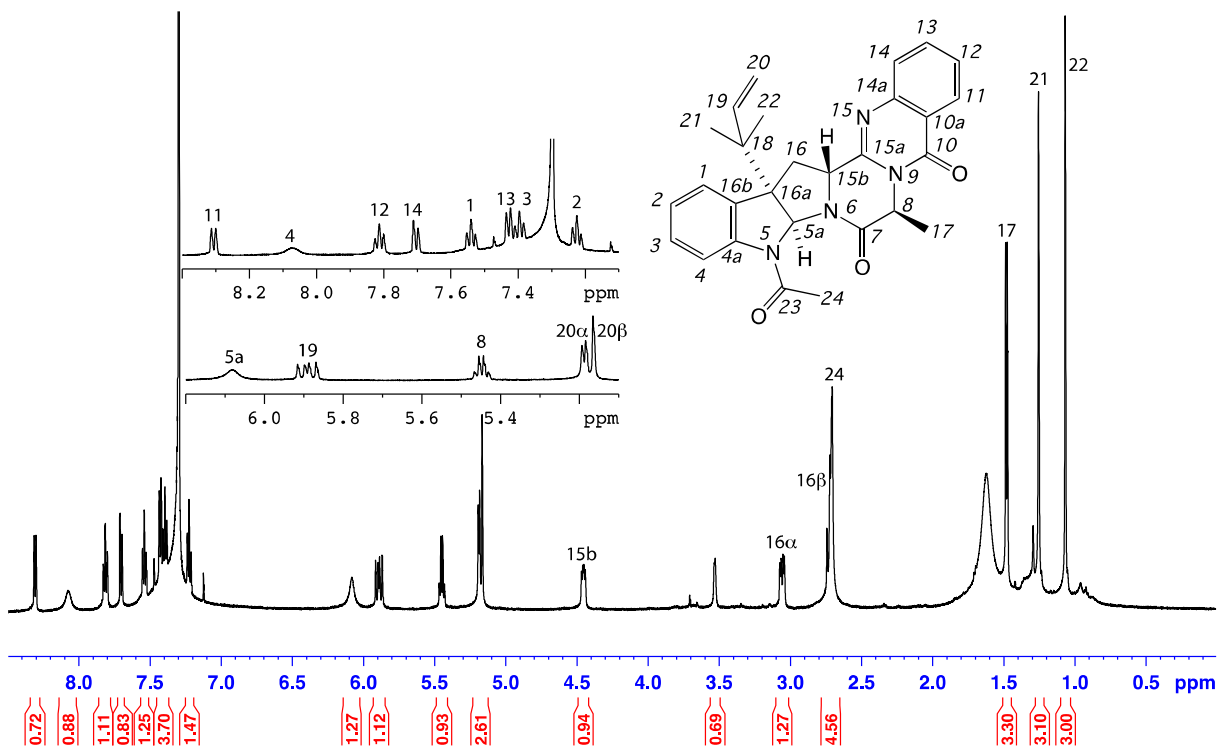

Figure S12.  $^1\text{H}$  NMR (600 MHz,  $\text{CDCl}_3$ ) spectrum of 5-*N*-acetylardeemin (**3**)

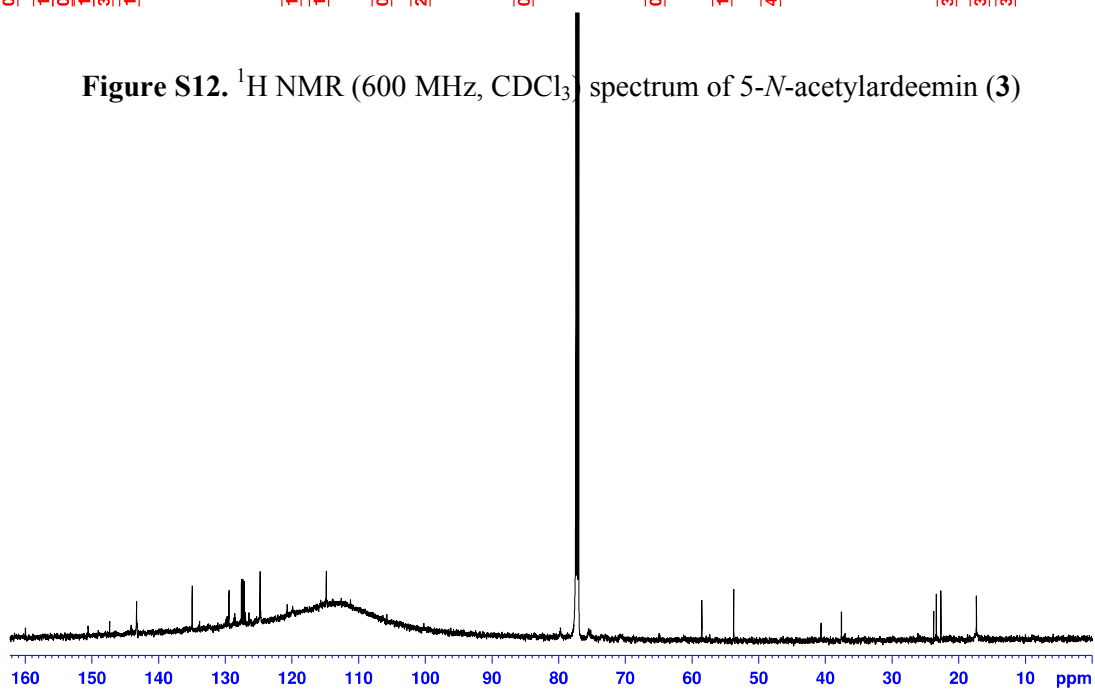

Figure S13.  $^{13}\text{C}$  NMR (150 MHz,  $\text{CDCl}_3$ ) spectrum of 5-*N*-acetylardeemin (**3**)

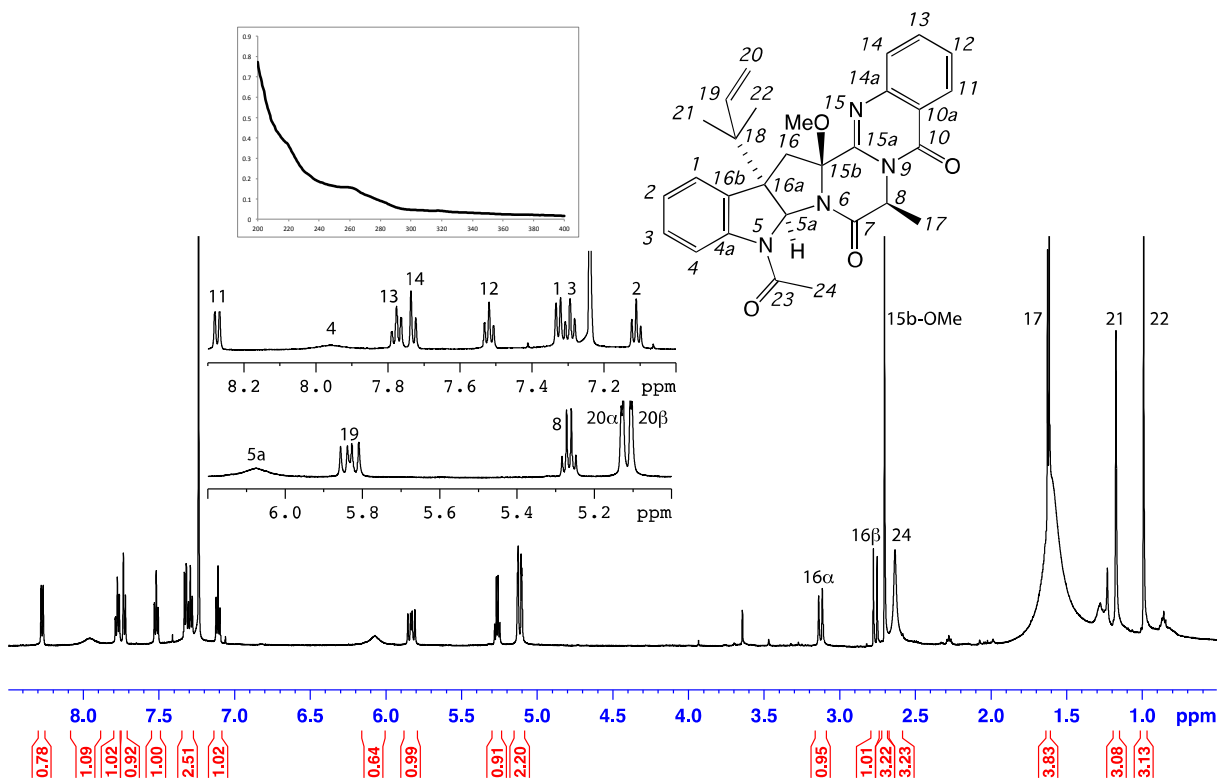

**Figure S14.**  $^1\text{H}$  NMR (600 MHz,  $\text{CDCl}_3$ ) and UV-vis spectra of 15b- $\beta$ -methoxy-5-*N*-acetylardeemin (**4**)

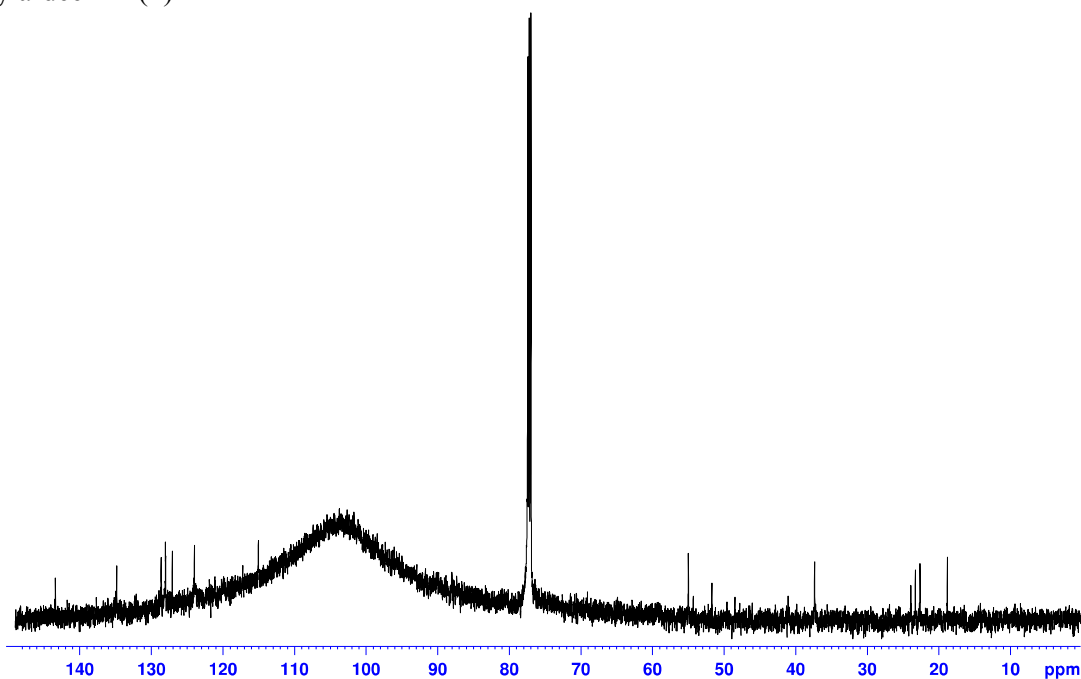

**Figure S15.**  $^{13}\text{C}$  NMR (150 MHz,  $\text{CDCl}_3$ ) spectrum of 15b- $\beta$ -methoxy-5-*N*-acetylardeemin (**4**)

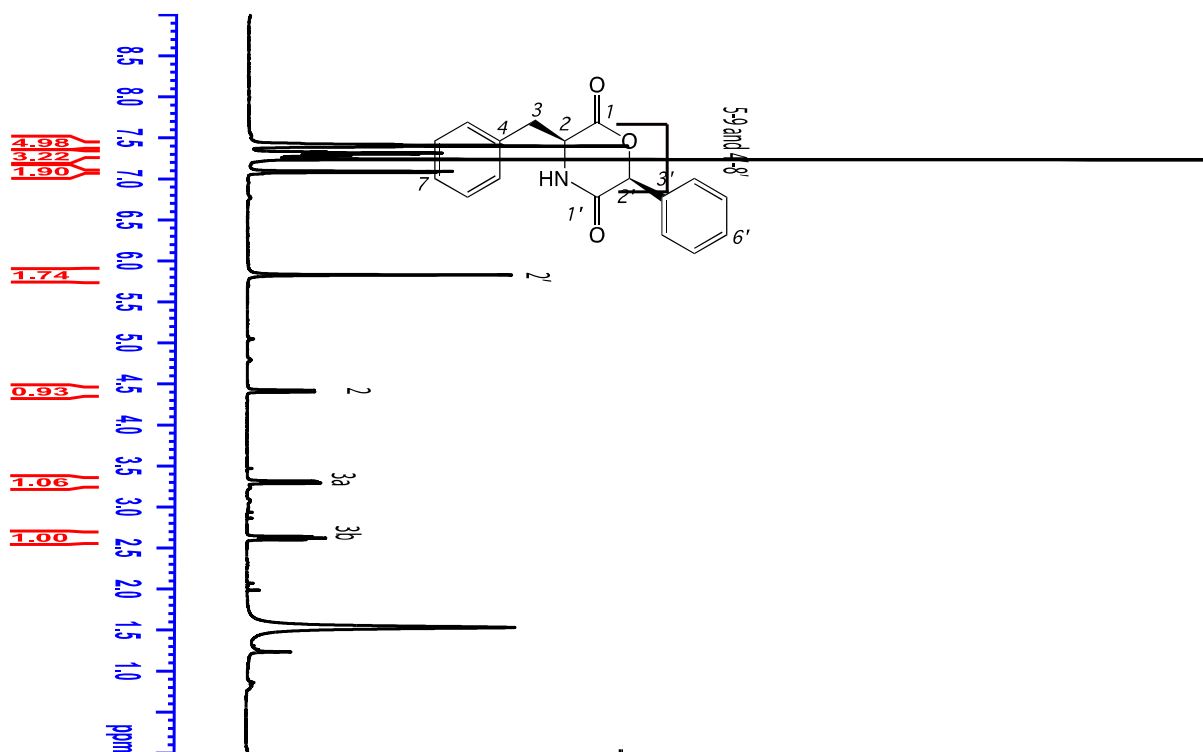

Figure S16.  $^1\text{H}$  NMR (600 MHz,  $\text{CDCl}_3$ ) spectrum of *cyclo*-(L-phenylalanine-L-mandelic acid) (**17**)

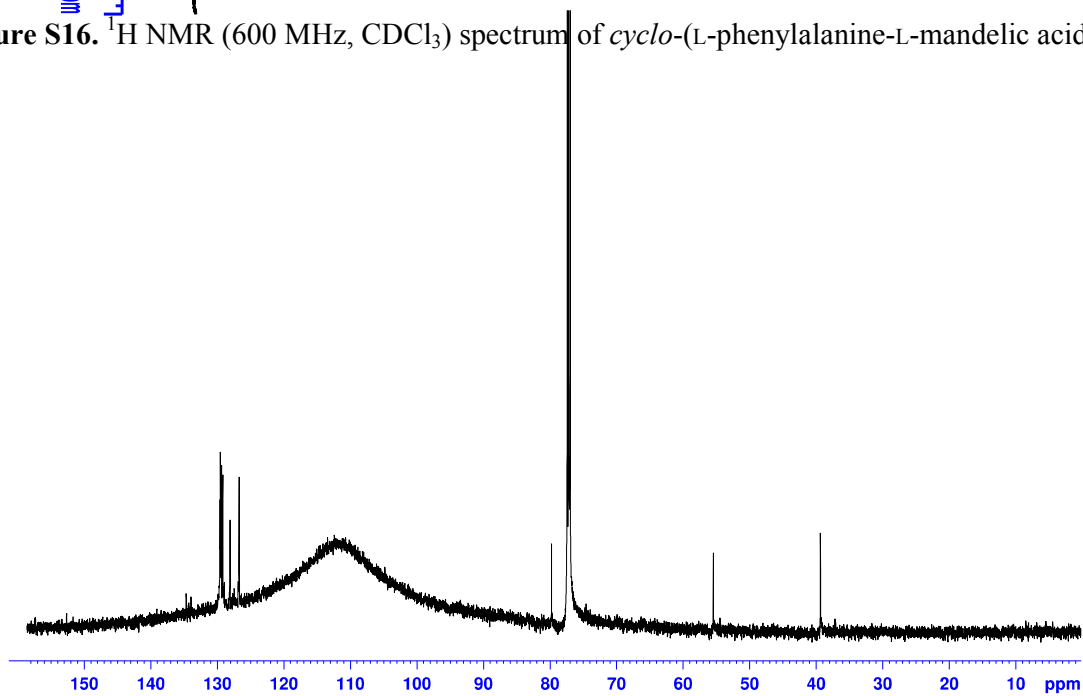

Figure S17.  $^{13}\text{C}$  NMR (150 MHz,  $\text{CDCl}_3$ ) spectrum of *cyclo*-(L-phenylalanine-L-mandelic acid) (**17**)

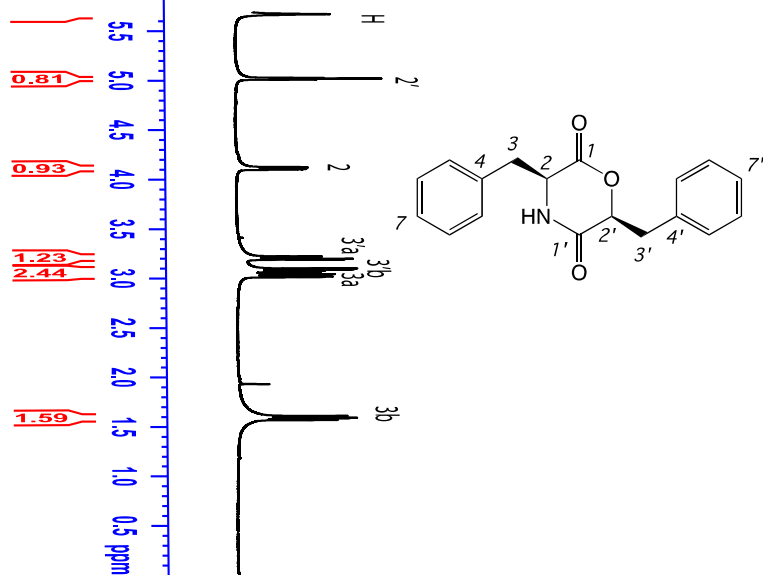

**Figure S18.**  $^1\text{H}$  NMR (600 MHz,  $\text{CDCl}_3$ ) spectrum of *cyclo*-(L-phenylalanine-L-phenyllactic acid) (18)

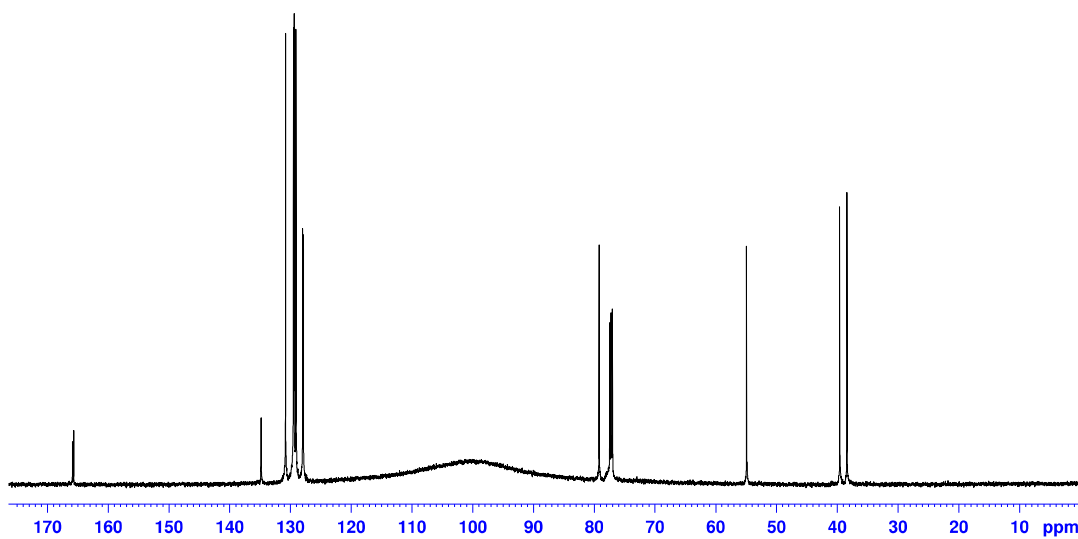

**Figure S19.**  $^{13}\text{C}$  NMR (150 MHz,  $\text{CDCl}_3$ ) spectrum of *cyclo*-(L-phenylalanine-L-phenyllactic acid) (18)

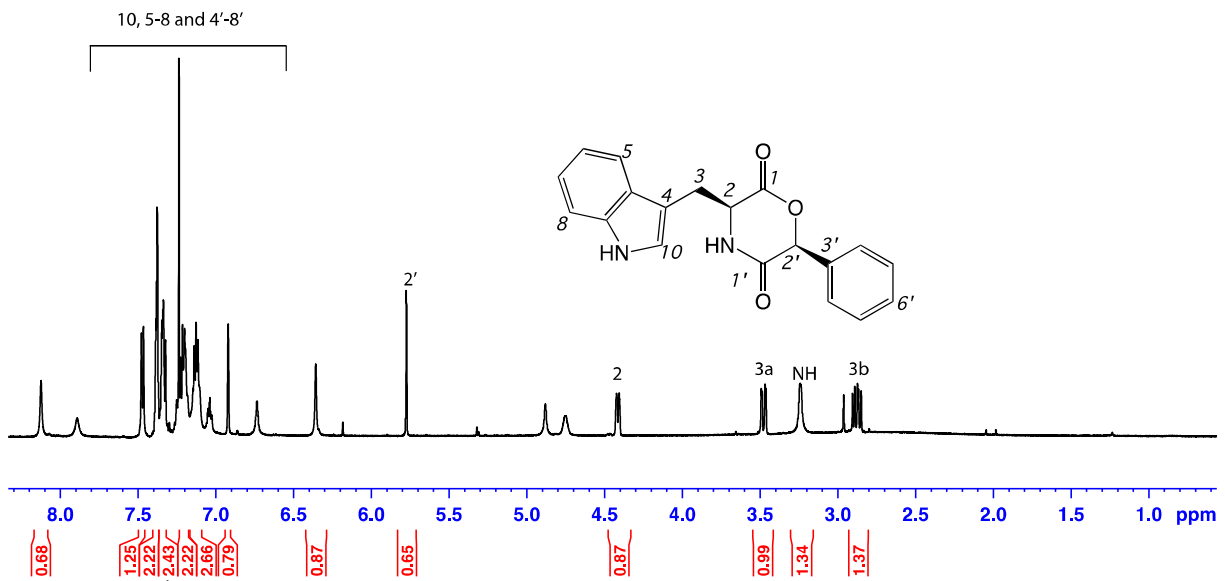

**Figure S20.**  $^1\text{H}$  NMR (600 MHz,  $\text{CDCl}_3$ ) spectrum of *cyclo*-(L-tryptophan-L-mandelic acid) (**19**)

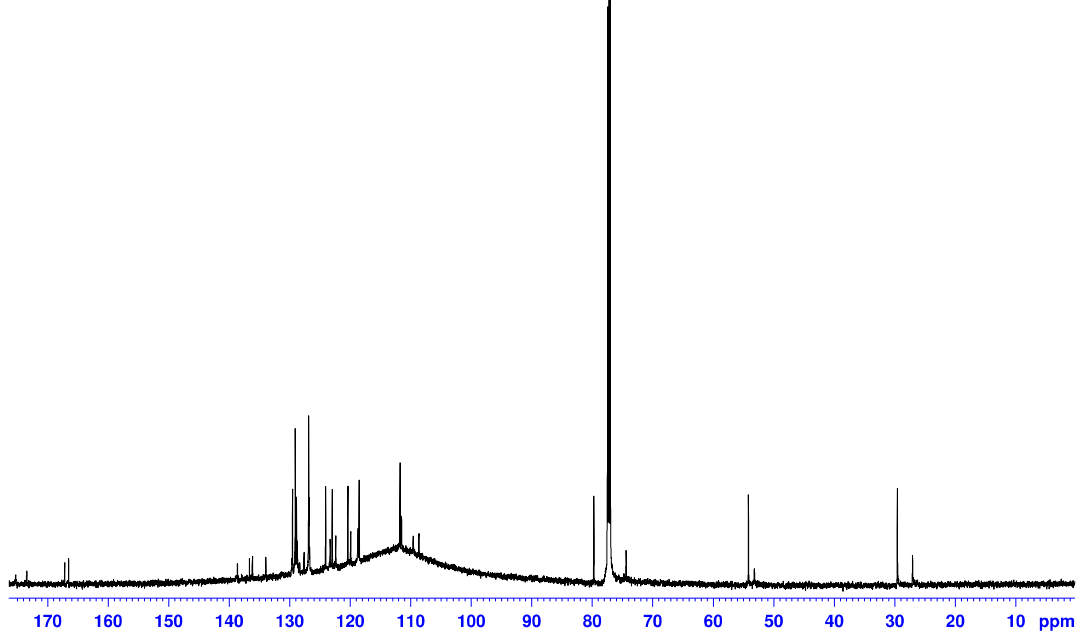

**Figure S21.**  $^{13}\text{C}$  NMR (150 MHz,  $\text{CDCl}_3$ ) spectrum of *cyclo*-(L-tryptophan-L-mandelic acid) (**19**)

\*impurities present in the spectra due to relative instability of the compounds

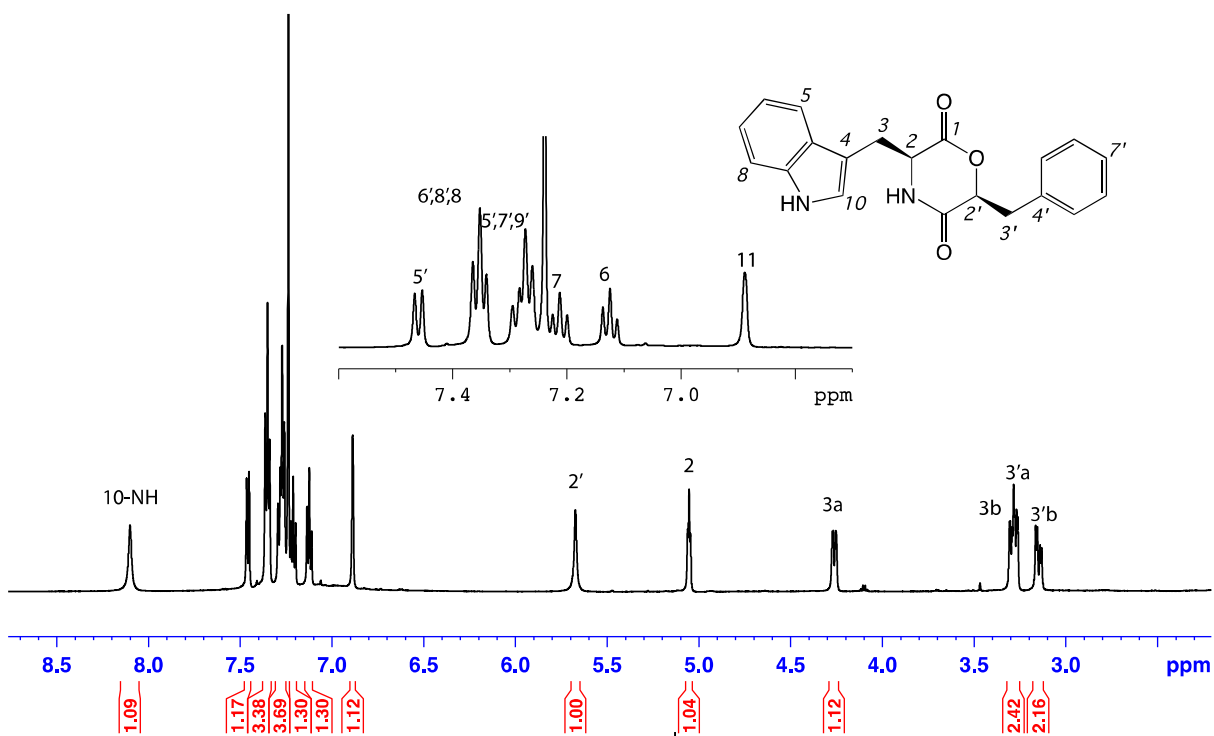

**Figure S22.** <sup>1</sup>H NMR (600 MHz, CDCl<sub>3</sub>) spectrum of *cyclo*-(L-tryptophan-L-phenyllactic acid) (20)

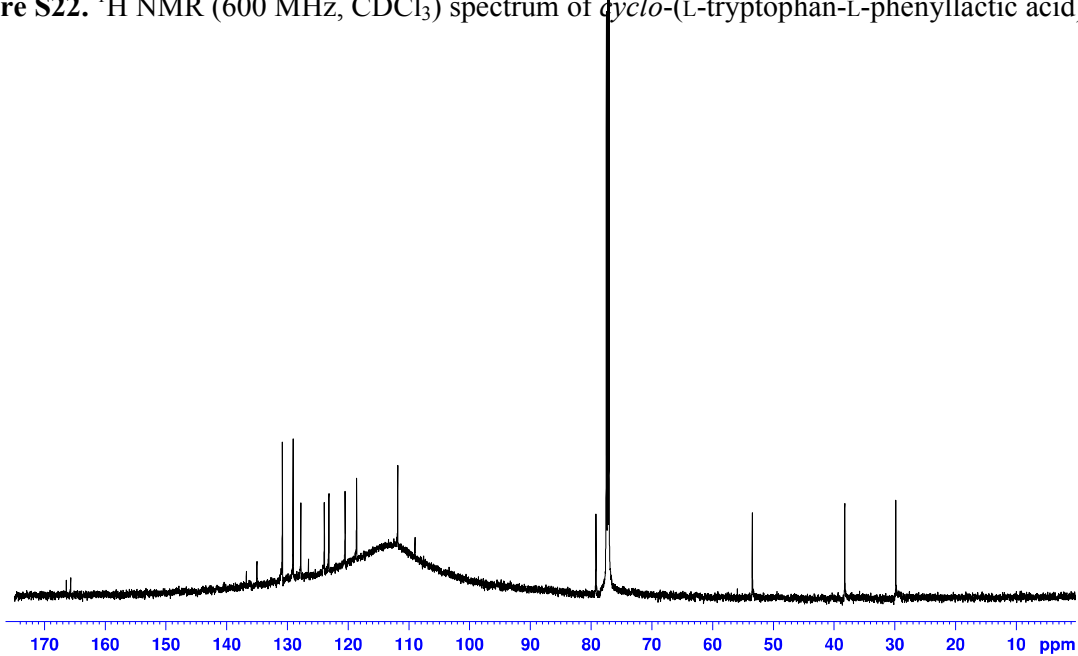

**Figure S23.** <sup>13</sup>C NMR (150 MHz, CDCl<sub>3</sub>) spectrum of *cyclo*-(L-tryptophan-L-phenyllactic acid) (20)

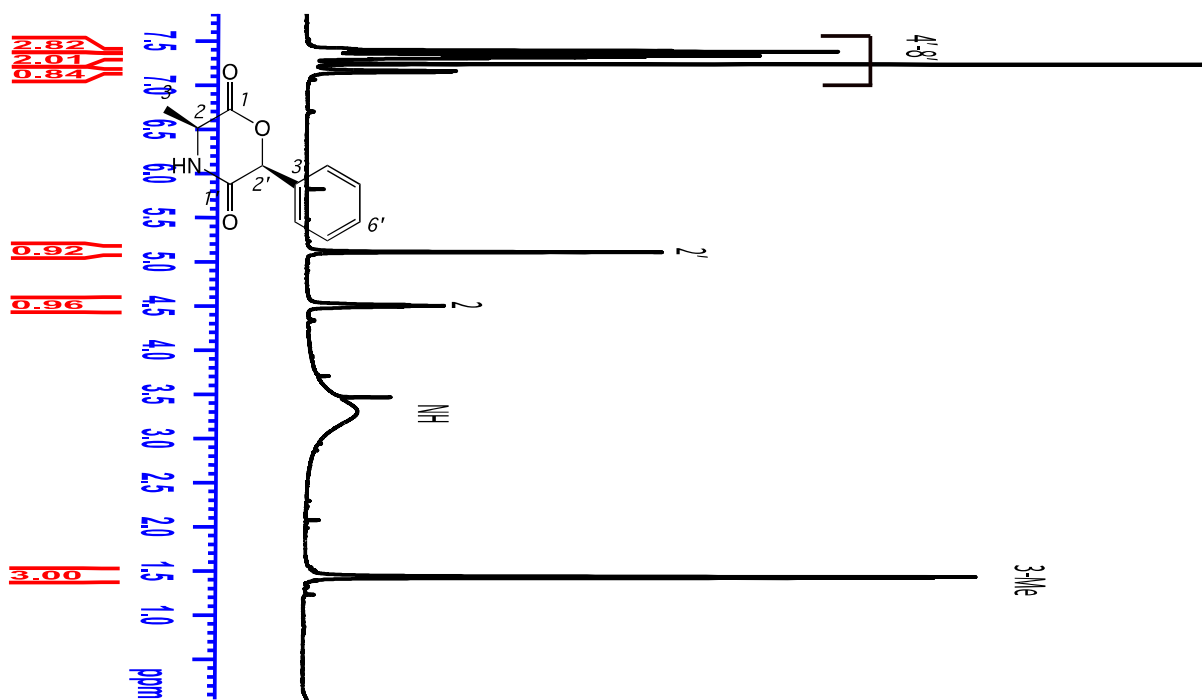

Figure S24.  $^1\text{H}$  NMR (600 MHz,  $\text{CDCl}_3$ ) spectrum of *cyclo*-(L-alanine-L-mandelic acid) (**21**)

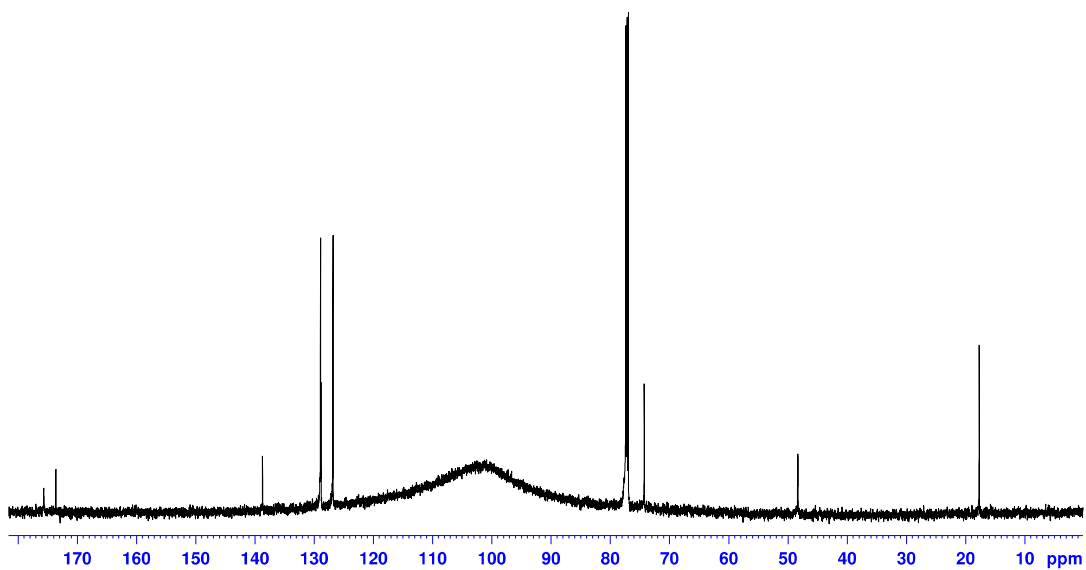

Figure S25.  $^{13}\text{C}$  NMR (150 MHz,  $\text{CDCl}_3$ ) spectrum of *cyclo*-(L-alanine-L-mandelic acid) (**21**)



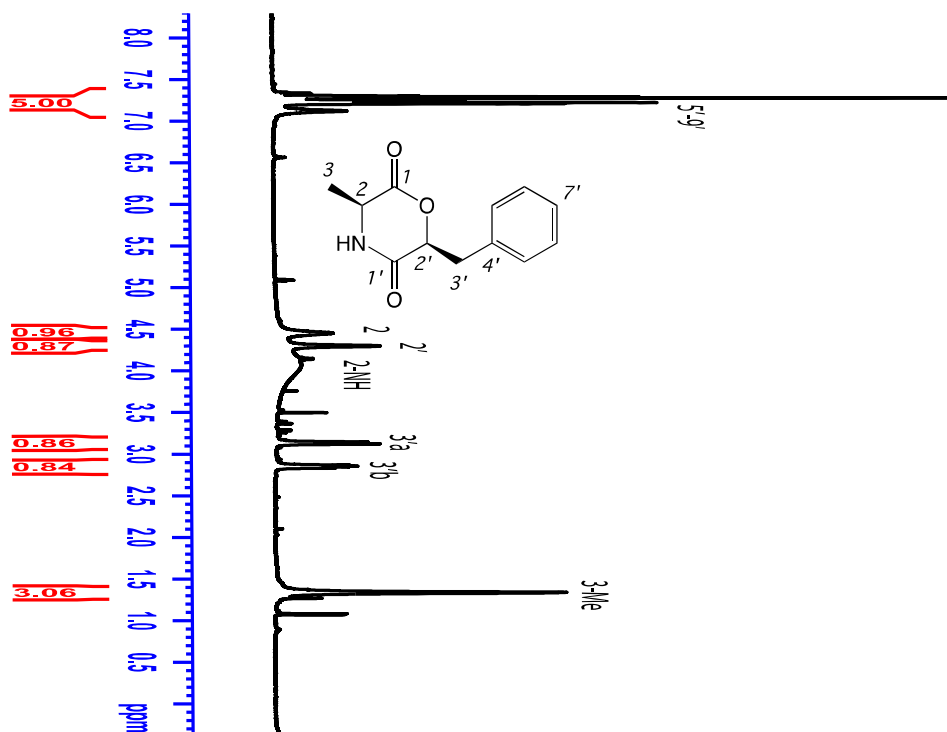

Figure S26.  $^1\text{H}$  NMR (600 MHz,  $\text{CDCl}_3$ ) spectrum of *cyclo*-(L-alanine-L-phenyllactic acid) (22)

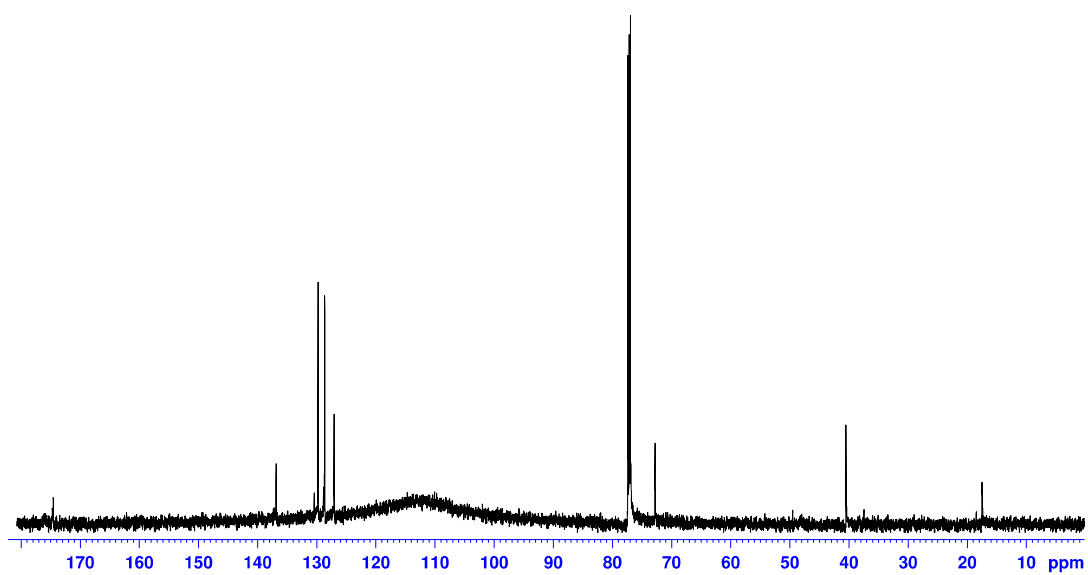

Figure S27.  $^{13}\text{C}$  NMR (150 MHz,  $\text{CDCl}_3$ ) spectrum of *cyclo*-(L-alanine-L-phenyllactic acid) (22)

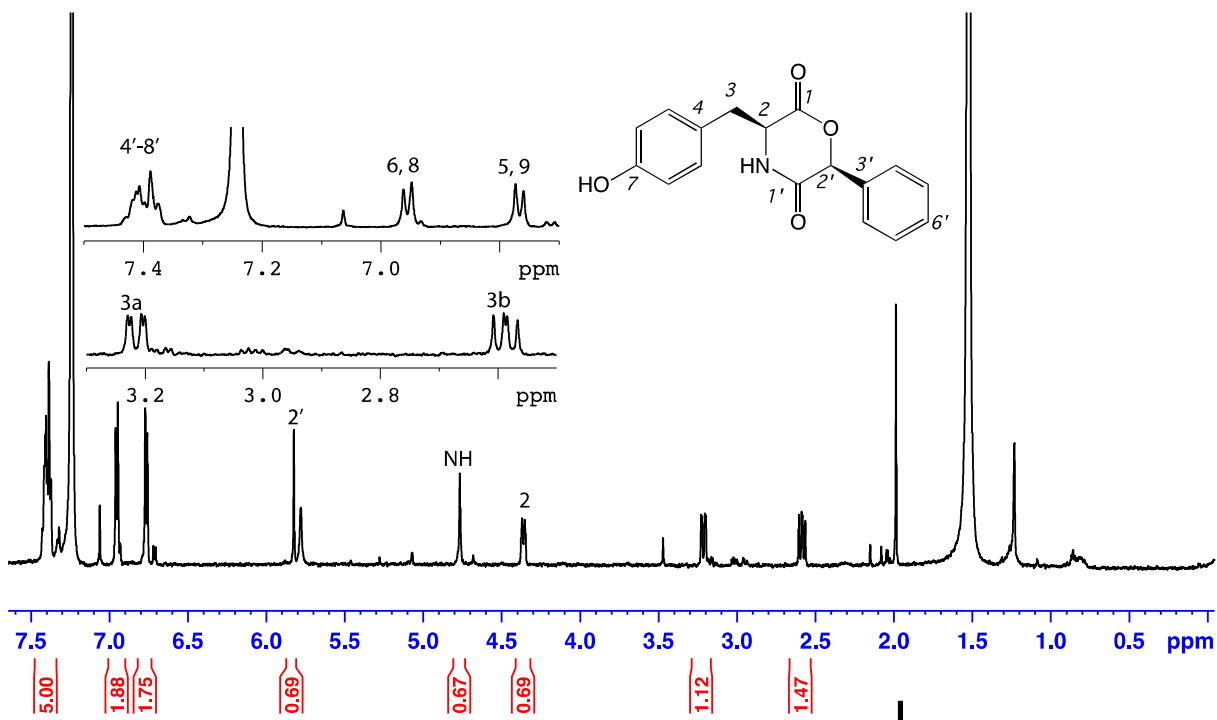

**Figure S28.**  $^1\text{H}$  NMR (600 MHz,  $\text{CDCl}_3$ ) spectrum of *cyclo*-(L-tyrosine-L-mandelic acid) (23)

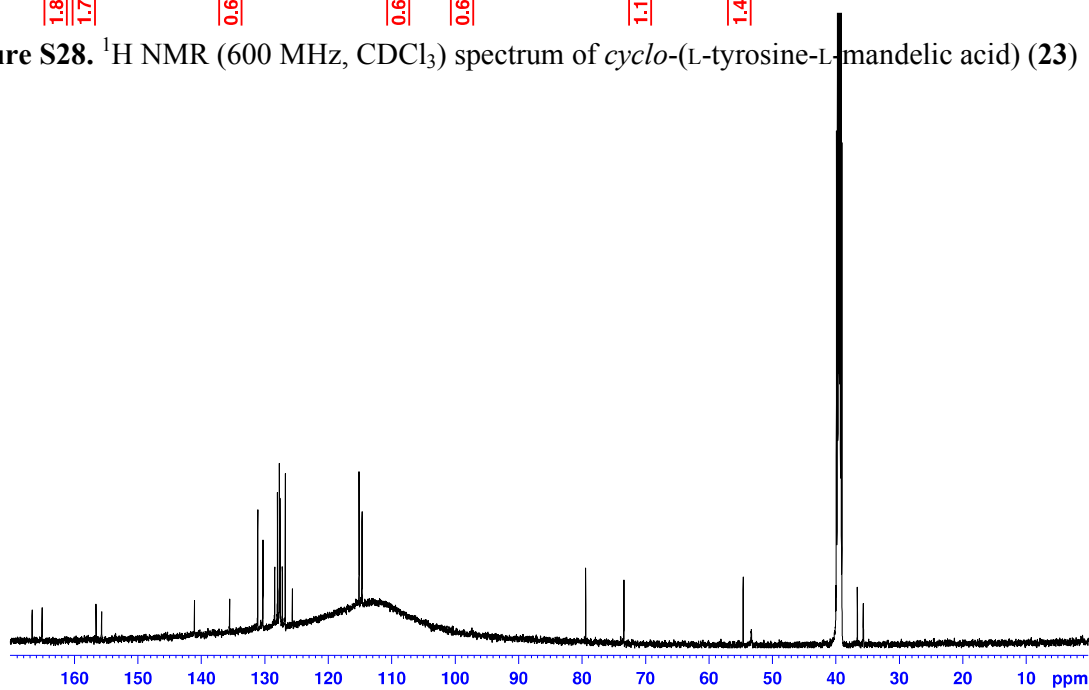

**Figure S29.**  $^{13}\text{C}$  NMR (150 MHz,  $\text{DMSO}-d_6$ ) spectrum of *cyclo*-(L-tyrosine-L-mandelic acid) (23)

\*impurities present in the spectra due to relative instability of the compounds

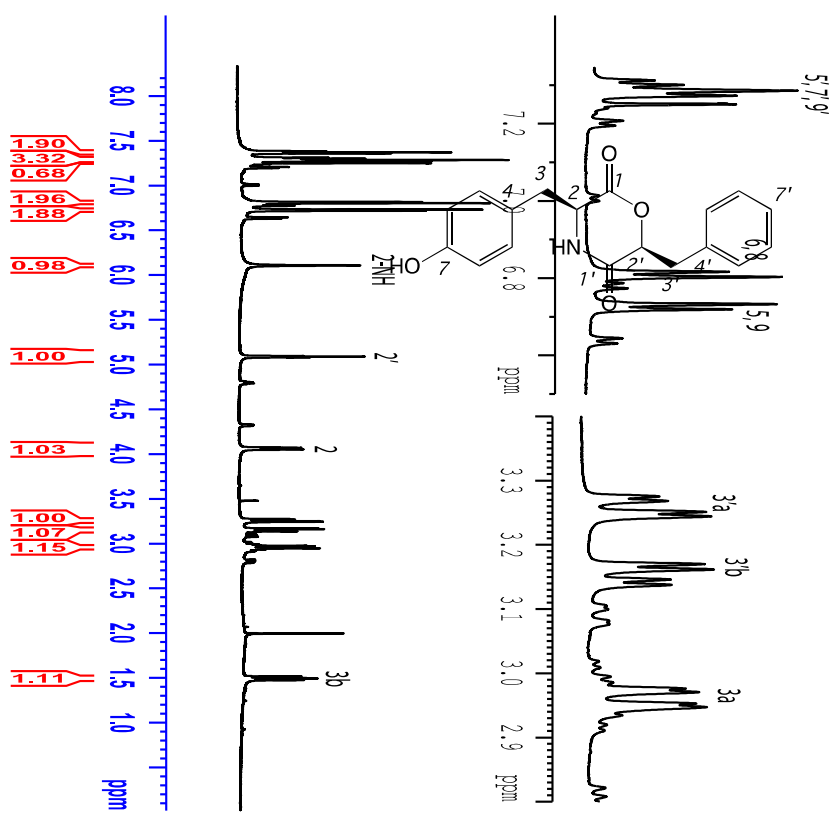

**Figure S30.** <sup>1</sup>H NMR (600 MHz, CDCl<sub>3</sub>) spectrum of *cyclo*-(L-tyrosine-L-phenyllactic acid) (**24**)

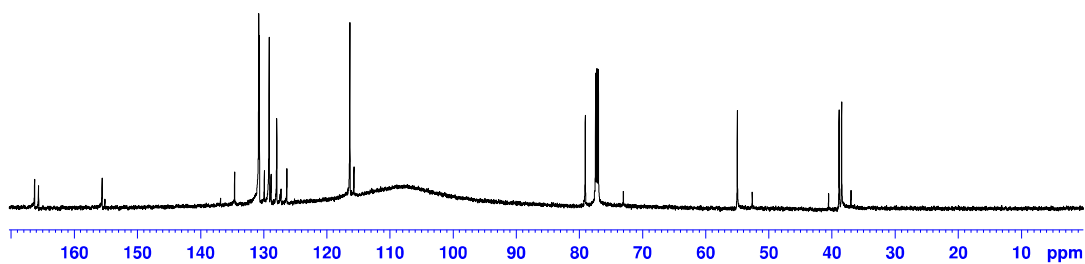

**Figure S31.** <sup>13</sup>C NMR (150 MHz, CDCl<sub>3</sub>) spectrum of *cyclo*-(L-tyrosine-L-phenyllactic acid) (**24**)

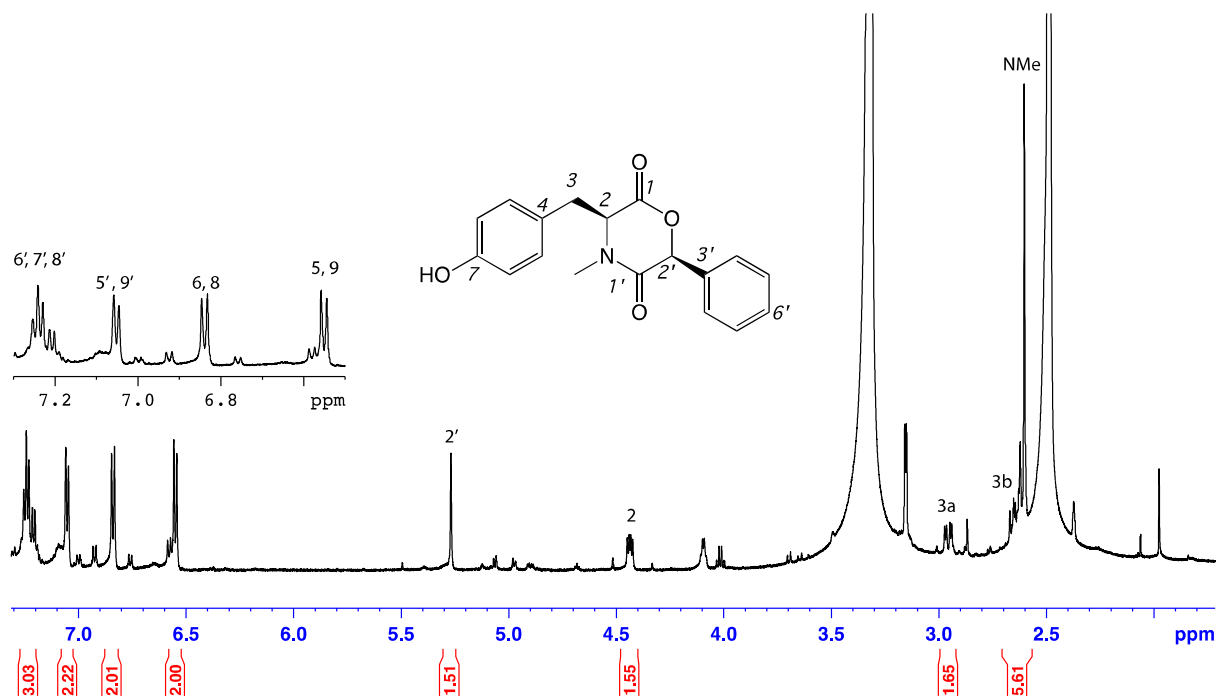

**Figure S32.**  $^1\text{H}$  NMR (600 MHz,  $\text{DMSO-}d_6$ ) spectrum of *cyclo*-(*N*-methyl-L-tyrosine-L-mandelic acid) (25)

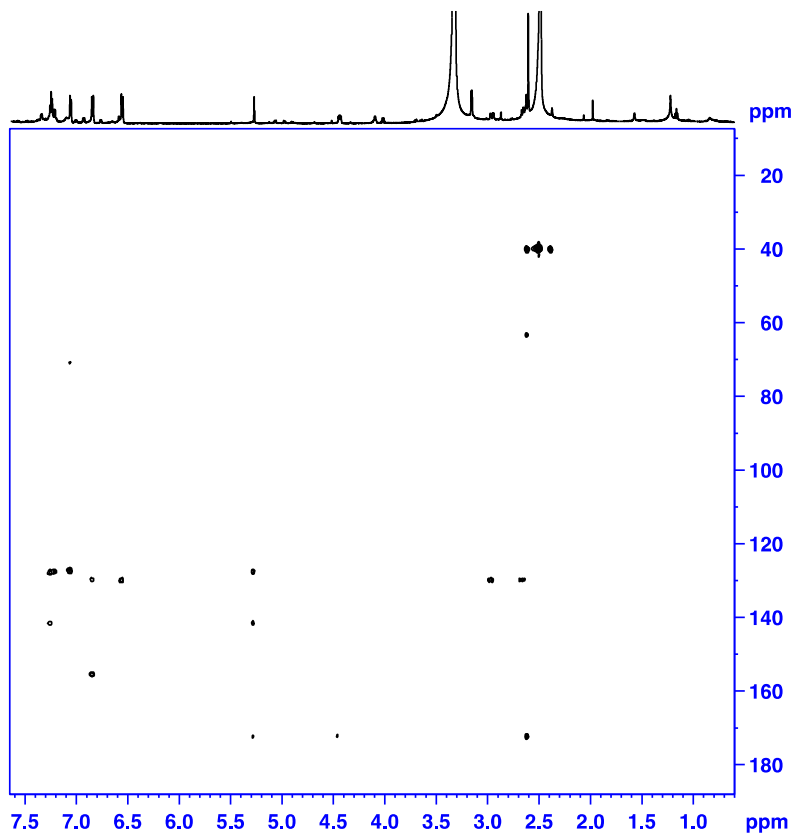

**Figure S33.** HMBC NMR (600 MHz,  $\text{DMSO-}d_6$ ) NMR spectrum of *cyclo*-(*N*-methyl-L-tyrosine-L-mandelic acid) (25)

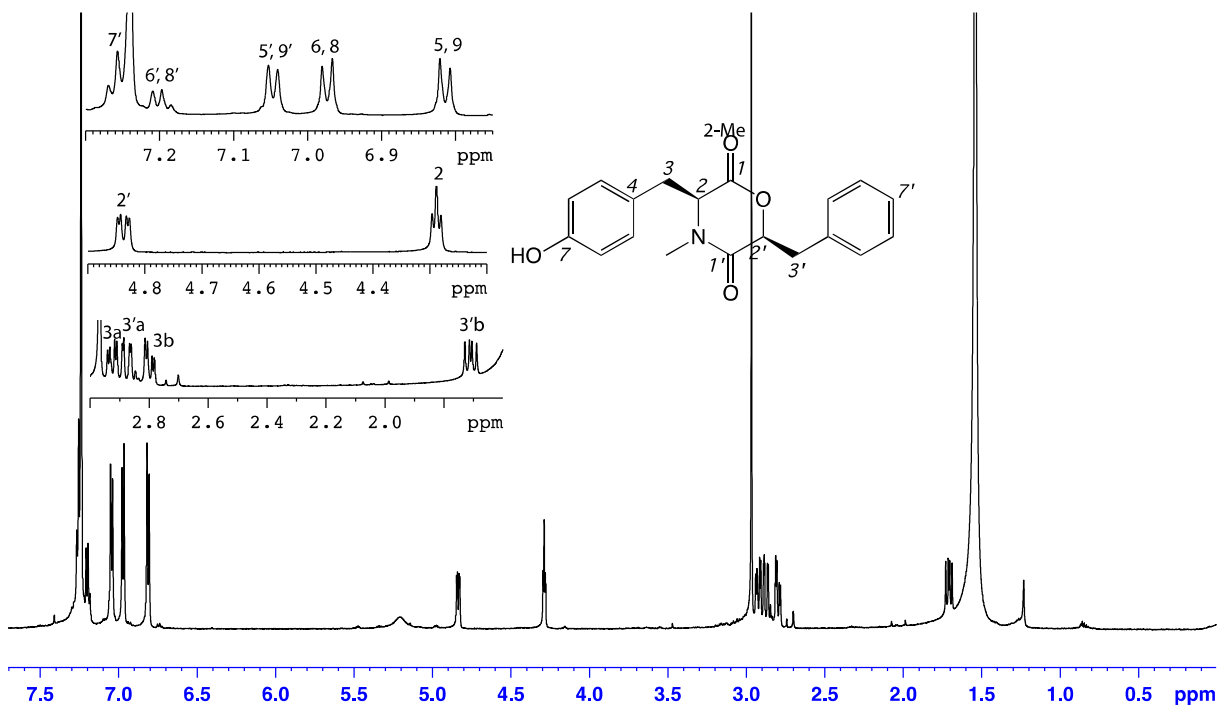

**Figure S34.**  $^1\text{H}$  NMR (600 MHz,  $\text{CDCl}_3$ ) spectrum of *cyclo*-(*N*-methyl-L-tyrosine-L-phenyllactic acid) (26)

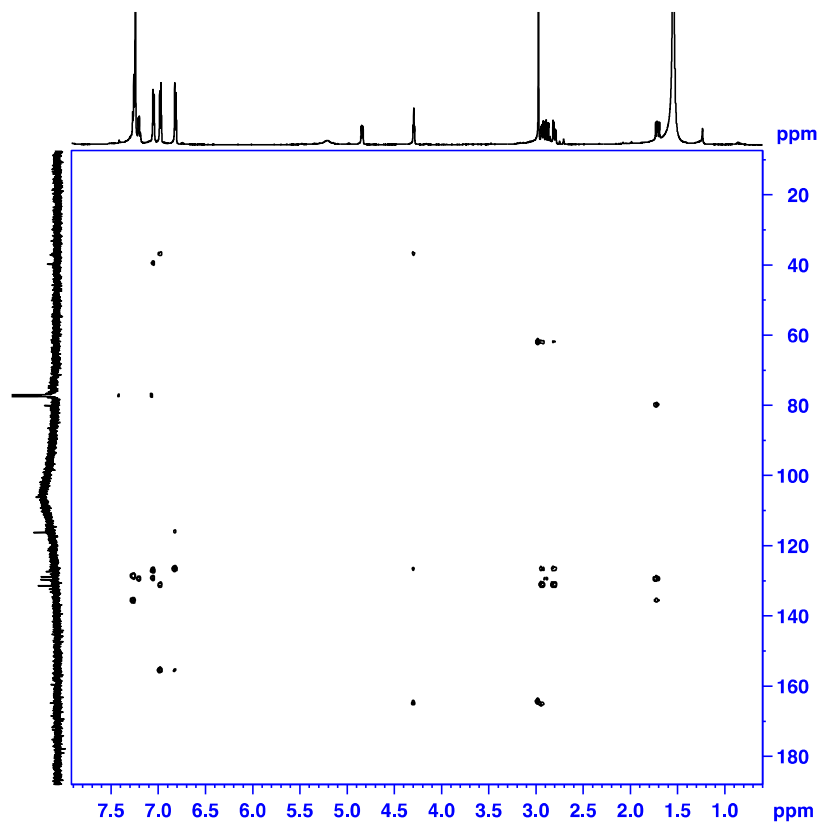

**Figure S35.** HMBC NMR (150 MHz,  $\text{CDCl}_3$ ) spectrum of *cyclo*-(*N*-methyl-L-tyrosine-L-phenyllactic acid) (26)

## 4 Biological Data

### 4.1 Antibiotic Screening Data for 1–4 and 1a

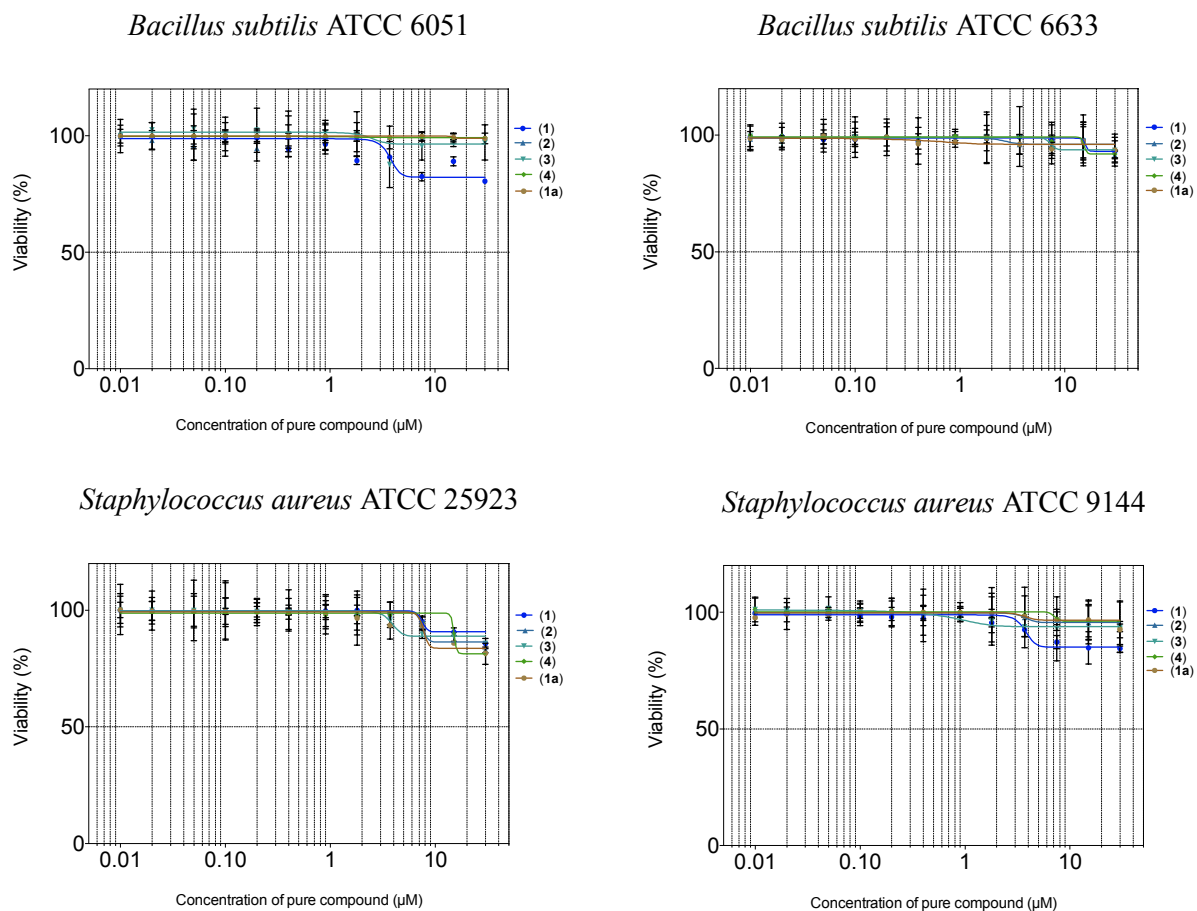

Figure S36. Antibiotic screening of compounds 1–4 and 1a (continued overleaf)

*Escherichia coli* ATCC 11775

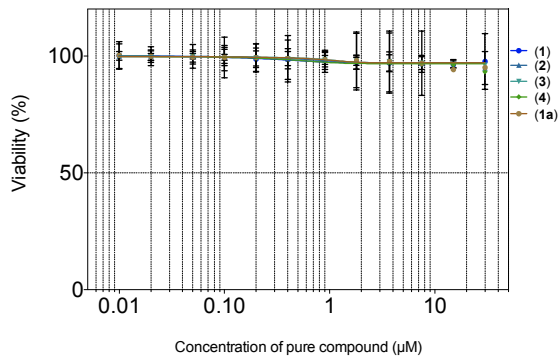

*Pseudomonas aeruginosa* ATCC 10145

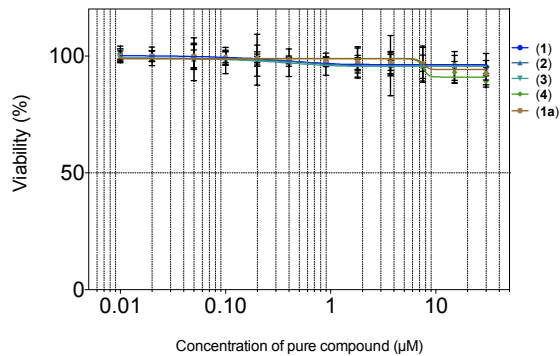

*Candida albicans* ATCC 90028

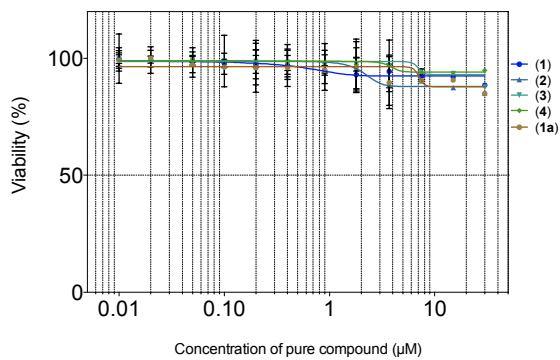

**Figure S36.** Continued... Antibiotic screening of compounds 1–4 and 1a

#### 4.2 Cytotoxicity and Calcein AM Screening Data for 1-4 and synthetic DKMs 17-24 and 19-22

**Table S6.** Cytotoxicity of compounds and their effects on accumulation of calcein AM in P-gp overexpressing SW620 Ad300 cells using flow cytometry

| #         | IC <sub>50</sub> (μM) <sup>a</sup> |             |        |       | FAR <sup>b</sup> |
|-----------|------------------------------------|-------------|--------|-------|------------------|
|           | SW620                              | SW620 Ad300 | KB-3-1 | KB-V1 |                  |
| <b>19</b> | > 30                               | > 30        | > 30   | > 30  | 55.5             |
| <b>24</b> | > 30                               | > 30        | > 30   | > 30  | 42.7             |
| <b>23</b> | > 30                               | > 30        | > 30   | > 30  | 41.3             |
| <b>1</b>  | > 30                               | > 30        | > 30   | > 30  | 38.9             |
| <b>2</b>  | > 30                               | > 30        | > 30   | > 30  | 30.8             |
| <b>4</b>  | > 30                               | > 30        | > 30   | > 30  | 30.5             |
| <b>20</b> |                                    |             |        |       | 10.4             |
| <b>3</b>  |                                    |             |        |       | 2.4              |
| <b>18</b> |                                    |             |        |       | 1.8              |
| <b>17</b> |                                    |             |        |       | 1.3              |
| <b>22</b> |                                    |             |        |       | 1.2              |
| <b>21</b> |                                    |             |        |       | 1.0              |

<sup>a</sup> Cell survival was determined by MTT assay.

<sup>b</sup> FAR (fluorescence arbitrary ratio) = calcein fluorescence intensity (geometric mean) in the presence of compounds **1-4** and **17-24**, **19-22** at 20 μM / calcein fluorescence intensity (geometric mean) in the presence of PBS, expressed as a ratio. Positive control is verapamil at 20 μM which FAR = 71.4

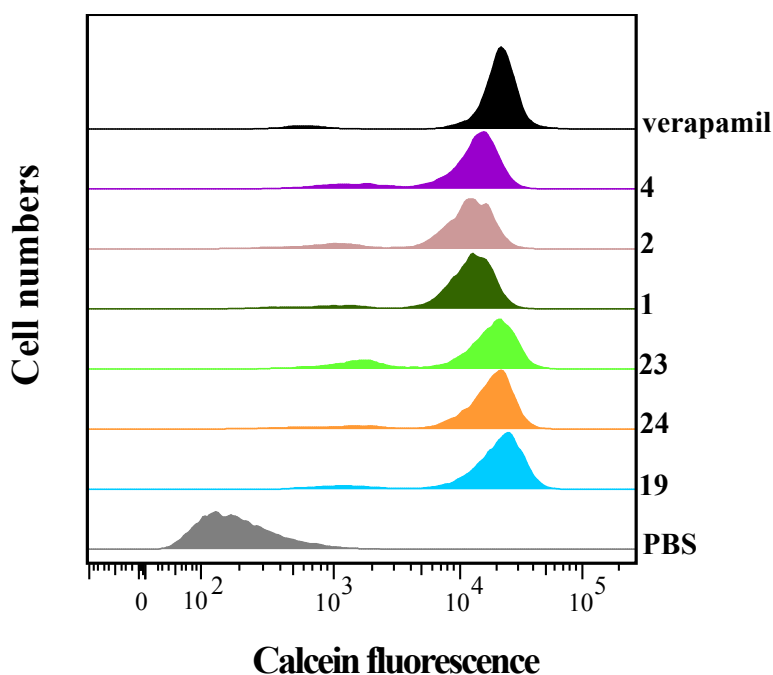

**Figure S37.** Effect of compounds on accumulation of calcein AM in P-gp-overexpressing SW620 Ad300 cells using flow cytometry



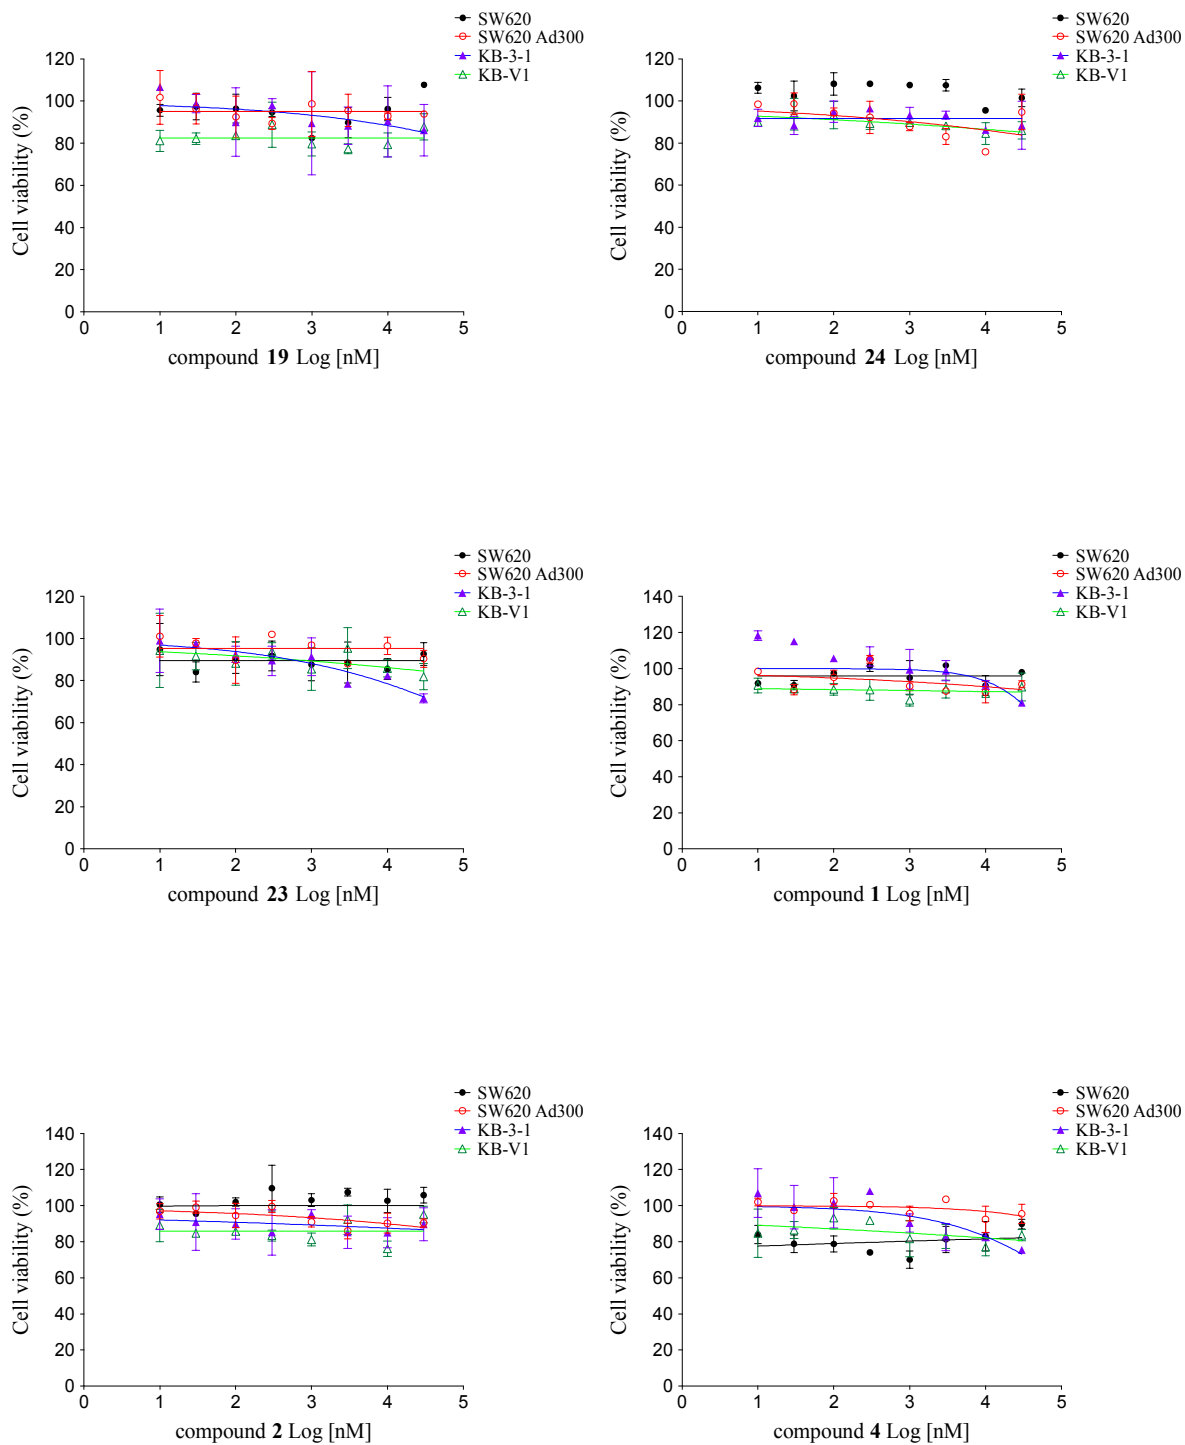

**Figure S38.** Cytotoxicity of compounds 1, 2, 4, 19, 23 and 24 against SW620, SW620 Ad300, KB-3-1 and KB-V1

## 5 References

- (1) Carmichael, J.; DeGraff, W. G.; Gazdar, A. F.; Minna, J. D.; Mitchell, J. B. *Cancer Research* **1987**, *47*, 943-946.
- (2) Hochlowski, J. E.; Mullally, M. M.; Spanton, S. G.; Whittern, D. N.; Hill, P.; McAlpine, J. B. *J. Antibiot.* **1993**, *46*, 380-386.
